# Supplementary material for: N2H2 binding to the nitrogenase FeMo cluster studied by QM/MM methods
Source: PubMed Central journal article supplement (PMC7186253; doi:10.1007/s00775-020-01780-5), 2020-04-07
Supplement: 775_2020_1780_MOESM1_ESM.pdf [file 775_2020_1780_MOESM1_ESM.pdf]

**N<sub>2</sub>H<sub>2</sub> binding to the nitrogenase FeMo cluster**  
**studied by QM/MM methods**

**Lili Cao and Ulf Ryde \***

Department of Theoretical Chemistry, Lund University, Chemical Centre, P. O. Box 124,  
SE-221 00 Lund, Sweden

Correspondence to Ulf Ryde, E-mail: [Ulf.Ryde@teokem.lu.se](mailto:Ulf.Ryde@teokem.lu.se),

Tel: +46 – 46 2224502, Fax: +46 – 46 2228648

**2020-04-01**

**Table S1.** Mulliken spin populations for the Fe and Mo ions in the FeMo cluster obtained from TPSS and B3LYP calculations with the def2-SV(P) basis set for the various states.

| Structure                             | BS       | TPSS |      |      |      |      |      |      | B3LYP |      |      |      |      |      |      |      |      |
|---------------------------------------|----------|------|------|------|------|------|------|------|-------|------|------|------|------|------|------|------|------|
|                                       |          | Fe1  | Fe2  | Fe3  | Fe4  | Fe5  | Fe6  | Fe7  | Mo    | Fe1  | Fe2  | Fe3  | Fe4  | Fe5  | Fe6  | Fe7  | Mo   |
| <b>End-on NNH<sub>2</sub> binding</b> |          |      |      |      |      |      |      |      |       |      |      |      |      |      |      |      |      |
| Fe1                                   | BS7-235  | 1.7  | -2.4 | -3.2 | 3.0  | -2.9 | 2.4  | 3.0  | -0.4  | 2.4  | -3.5 | -3.7 | 3.7  | -3.5 | 3.5  | 3.6  | -1.1 |
| Fe2                                   | BS7-235  | 3.3  | -2.5 | -2.9 | 2.9  | -2.6 | 0.4  | 2.2  | 0.1   | 3.7  | -3.8 | -3.7 | 3.6  | -3.5 | 3.2  | 3.3  | -1.0 |
| Fe3                                   | BS10-147 | 3.2  | -2.6 | -2.0 | 3.1  | -2.4 | -1.3 | 2.3  | 0.2   | 3.6  | -3.4 | -2.5 | 3.7  | -3.3 | -3.1 | 3.5  | 0.9  |
| Fe4                                   | BS7-235  | 3.2  | -2.7 | -2.8 | 2.3  | -2.9 | 2.2  | 2.4  | -0.1  | 3.6  | -3.7 | -3.6 | 3.1  | -3.6 | 3.3  | 3.4  | -0.8 |
| Fe5                                   | BS7-235  | 3.4  | -3.4 | -3.1 | 2.5  | -2.5 | 2.3  | 2.1  | -0.2  | 3.6  | -3.8 | -3.8 | 3.4  | -3.5 | 3.4  | 3.4  | -1.1 |
| Fe6                                   | BS10-147 | -3.2 | 2.6  | 2.7  | -3.0 | 2.7  | 1.6  | -2.2 | -0.3  | -3.7 | 3.6  | 3.6  | -3.6 | 3.6  | 2.1  | -3.5 | -0.7 |
| Fe6(HCA)                              | BS10-135 | -3.2 | 2.8  | -3.0 | 2.8  | -2.5 | 1.6  | 2.7  | -0.2  | -3.7 | 3.6  | -3.7 | 3.5  | -3.5 | 2.2  | 3.5  | -0.9 |
| Fe6(HNNH <sub>2</sub> )               | BS10-135 | -3.2 | 2.9  | 2.8  | -3.0 | 2.8  | 1.8  | -2.5 | -0.3  | -3.7 | 3.6  | 3.6  | -3.6 | 3.6  | 2.7  | -3.5 | -0.8 |
| Fe6(S2B)                              | BS10-127 | -3.3 | -2.8 | 2.9  | 2.8  | 2.2  | 1.5  | -2.5 | -0.1  | -3.7 | -3.5 | 3.5  | 3.4  | 3.0  | 2.6  | -3.5 | -0.7 |
| Fe7                                   | BS7-235  | 3.4  | -2.8 | -3.1 | 3.1  | -2.6 | 2.7  | 1.0  | -0.9  | 3.7  | -3.6 | -3.7 | 3.7  | -3.5 | 3.6  | 2.1  | -1.3 |
| Fe3(S2A)                              | BS7-235  | 3.1  | -3.0 | -2.9 | 2.5  | -2.8 | 2.2  | 2.1  | -0.1  | 3.6  | -3.7 | -3.7 | 3.5  | -3.6 | 3.3  | 3.3  | -0.8 |
| Fe2/4                                 | BS7-235  | 2.5  | -2.5 | -2.8 | 1.8  | -2.6 | 2.3  | 2.5  | -0.2  | 3.5  | -3.6 | -3.6 | 3.4  | -3.5 | 3.3  | 3.4  | -1.0 |
| Fe3/4                                 | BS7-235  | 2.6  | -2.9 | -2.0 | 1.7  | -2.7 | 2.4  | 2.5  | -0.2  | 3.6  | -3.7 | -3.7 | 3.6  | -3.5 | 3.4  | 3.4  | -1.0 |
| Fe2/6/7                               | BS7-235  | 3.3  | -2.0 | -2.8 | 2.8  | -2.8 | 1.8  | 0.7  | -0.2  | 3.7  | -3.2 | -3.7 | 3.5  | -3.5 | 3.2  | 2.5  | -1.1 |
| Fe2/6(5)                              | BS10-147 | 3.3  | -2.1 | -2.7 | 3.1  | -2.7 | -0.8 | 2.3  | 0.3   | 3.7  | -2.8 | -3.5 | 3.6  | -3.4 | -2.7 | 3.5  | 1.2  |
| Fe3/7(2)                              | BS5-256  | 3.4  | -2.6 | 0.1  | 3.0  | -2.7 | -2.1 | 1.3  | 0.4   | 3.7  | -3.8 | 2.4  | 3.5  | -3.5 | -3.5 | 2.1  | 1.1  |
| Fe3/7(3)                              | BS7-235  | 3.3  | -2.9 | -2.1 | 3.0  | -2.7 | 2.1  | 0.5  | 0.1   | 3.7  | -3.7 | -3.6 | 3.6  | -3.5 | 3.2  | 2.3  | -0.7 |
| Fe4/5(2)                              | BS7-235  | 3.3  | -2.8 | -2.9 | 1.7  | -2.6 | 2.2  | 2.3  | -0.3  | 3.6  | -3.7 | -3.6 | 3.1  | -3.4 | 3.4  | 3.4  | -1.2 |
| Fe4/5(5)                              | BS7-235  | 3.3  | -2.7 | -2.8 | 1.5  | -2.8 | 2.3  | 2.5  | -0.2  | 3.8  | -3.6 | -3.6 | 2.4  | -3.6 | 3.4  | 3.5  | -1.0 |
| Fe2/3/6/7                             | BS7-235  | 3.3  | -1.3 | -2.9 | 2.9  | -2.7 | 2.3  | -1.1 | 0.1   | 3.7  | -2.7 | -3.6 | 3.6  | -3.3 | 3.6  | -2.3 | 0.6  |
| Fe2/4/5/6                             | BS7-235  | 3.3  | -3.0 | -3.0 | 1.7  | -2.1 | 2.4  | 2.3  | -0.3  | 3.6  | -3.7 | -3.7 | 2.9  | -3.2 | 3.4  | 3.4  | -1.1 |
| Fe3/4/5/7                             | BS7-235  | 3.3  | -2.7 | -2.8 | 1.6  | -2.5 | 2.5  | 1.2  | -0.1  | 3.8  | -3.6 | -3.6 | 2.4  | -3.5 | 3.4  | 2.4  | -0.7 |
| <b>Side-on cis-HNNH binding</b>       |          |      |      |      |      |      |      |      |       |      |      |      |      |      |      |      |      |
| Fe2Fe2                                | BS10-147 | 3.3  | -2.3 | -2.7 | 3.1  | -2.3 | -1.2 | 2.6  | 0.1   | 3.7  | -2.6 | -3.4 | 3.7  | -3.3 | -3.0 | 3.5  | 0.8  |
| Fe4Fe4                                | BS10-147 | -3.2 | 2.3  | 2.7  | -2.6 | 1.8  | 2.1  | -2.6 | -0.1  | -3.7 | 3.4  | 3.4  | -3.4 | 2.8  | 2.8  | -3.5 | -0.6 |
| Fe5Fe5                                | BS10-146 | 3.2  | -2.7 | -2.5 | 3.1  | -1.6 | 2.7  | -1.8 | 0.1   | 3.7  | -3.5 | -3.3 | 3.7  | -2.5 | 3.5  | -3.0 | 0.9  |
| Fe6Fe6                                | BS7-235  | 3.4  | -3.1 | -2.9 | 3.1  | -2.7 | 1.2  | 1.8  | 0.2   | 3.7  | -3.6 | -3.8 | 3.6  | -3.5 | 3.0  | 3.3  | -0.8 |
| Fe7Fe7                                | BS5-256  | 3.2  | -2.8 | 1.0  | 3.0  | -2.7 | -1.9 | 1.2  | 0.3   | 3.6  | -3.7 | 2.4  | 3.5  | -3.6 | -3.5 | 2.7  | 0.7  |
| Fe2/3Fe6/7                            | BS7-235  | 3.3  | -2.3 | -2.0 | 2.9  | -2.7 | 0.9  | 0.8  | -0.4  | 3.7  | -3.8 | -3.8 | 3.5  | -3.5 | 2.4  | 3.5  | -1.2 |

|                                  |          |      |      |      |      |      |      |      |      |      |      |      |      |      |      |      |      |
|----------------------------------|----------|------|------|------|------|------|------|------|------|------|------|------|------|------|------|------|------|
| Fe2/6Fe3/7                       | BS7-235  | 3.0  | -2.4 | -2.1 | 0.9  | -2.5 | 2.2  | 1.9  | -0.2 | 3.7  | -3.6 | -3.6 | 3.5  | -3.5 | 2.8  | 2.7  | -0.9 |
| Fe2/6Fe3/7tr <sup>a</sup>        | BS6-156  | 3.1  | -1.6 | -1.1 | -2.9 | 2.7  | 1.1  | 0.0  | -0.4 | -3.6 | 3.0  | 2.6  | 3.6  | -3.5 | -3.5 | 2.4  | 0.9  |
| Fe2/4Fe5/6                       | BS2-234  | 3.1  | -1.6 | -2.7 | -1.4 | 0.2  | 1.4  | 2.5  | -0.5 | 3.8  | -2.6 | -3.5 | -3.7 | 2.8  | 2.6  | 3.4  | -2.1 |
| Fe2/6Fe4/5                       | BS3-134  | 3.1  | -1.9 | 1.7  | 1.9  | -1.3 | -0.5 | -2.4 | 0.3  | 3.7  | -3.0 | 3.5  | 2.7  | -2.7 | -2.7 | -3.5 | 2.2  |
| Fe2/6Fe4                         | BS7-235  | 3.2  | -1.6 | -2.8 | 1.4  | -2.7 | 1.2  | 2.4  | -0.2 | 3.6  | -2.7 | -3.7 | 2.8  | -3.5 | 2.7  | 3.4  | -1.2 |
| Fe3/7Fe4/5                       | BS2-234  | 3.0  | -2.7 | -1.6 | -1.8 | 1.1  | 2.4  | 0.8  | -0.5 | 3.8  | -3.5 | -3.5 | -3.5 | 2.7  | 3.5  | 2.7  | -2.3 |
| Fe2Fe7                           | BS7-235  | 3.3  | -2.6 | -3.0 | 3.0  | -2.8 | 2.2  | 0.9  | -0.2 | 3.7  | -3.6 | -3.8 | 3.5  | -3.5 | 3.4  | 2.2  | -0.8 |
| Fe3Fe6                           | BS10-147 | 3.5  | -3.3 | -1.3 | 2.8  | -2.7 | -1.1 | 2.4  | 0.2  | 3.7  | -3.7 | -2.0 | 3.6  | -3.5 | -2.4 | 3.5  | 0.8  |
| Fe2Fe6(3)                        | BS8-245  | 3.3  | -2.0 | -2.6 | 3.0  | -2.7 | -0.7 | 2.2  | 0.3  | 3.7  | -2.9 | -3.5 | 3.7  | -3.4 | -2.4 | 3.5  | 1.0  |
| Fe2Fe6(5)                        | BS7-235  | 3.2  | -2.8 | -3.0 | 2.9  | -2.7 | 1.1  | 2.3  | -0.2 | 3.7  | -3.6 | -3.8 | 3.5  | -3.5 | 2.3  | 3.4  | -1.1 |
| Fe3/7Fe3(2)                      | BS8-245  | -3.5 | 2.9  | -0.5 | 3.0  | 2.6  | -2.4 | -1.1 | 0.2  | -3.8 | 3.6  | -1.3 | 3.6  | 3.5  | -3.4 | -2.7 | 0.9  |
| Fe3Fe7(3)                        | BS5-256  | 3.3  | -2.6 | 1.5  | 3.0  | -2.7 | -1.8 | 0.3  | 0.5  | 3.7  | -3.7 | 2.5  | 3.6  | -3.5 | -3.4 | 2.1  | 1.4  |
| Fe45Fe5(2)                       | BS7-235  | 3.3  | -2.7 | -2.8 | 0.4  | -2.0 | 2.3  | 2.5  | -0.4 | 3.8  | -3.6 | -3.6 | 1.7  | -3.4 | 3.4  | 3.4  | -1.1 |
| Fe4Fe5(5)                        | BS6-167  | 3.4  | -2.8 | -3.2 | 0.0  | -1.2 | 2.3  | 2.3  | -0.3 | 3.8  | -3.5 | -3.6 | -1.1 | -2.0 | 3.4  | 3.4  | -1.3 |
| <b>End-on trans-HNNH binding</b> |          |      |      |      |      |      |      |      |      |      |      |      |      |      |      |      |      |
| Fe2(trans)                       | BS10-147 | -3.2 | 2.1  | 3.0  | -3.0 | 2.6  | 2.4  | -2.4 | -0.3 | 3.7  | -3.6 | -3.7 | 3.6  | 3.5  | -3.7 | 3.6  | -2.4 |
| Fe3(trans)                       | BS10-146 | -3.3 | 2.9  | 2.0  | -2.9 | 2.6  | -2.4 | 2.6  | -0.2 | -3.7 | 3.7  | 2.3  | -3.6 | 3.4  | -3.5 | 3.4  | -0.7 |
| Fe4(trans)                       | BS7-235  | 3.3  | -2.7 | -2.8 | 1.2  | -2.8 | 2.3  | 2.5  | -0.2 | 3.8  | -3.6 | -3.6 | 2.0  | -3.6 | 3.4  | 3.4  | -1.0 |
| Fe5(trans)                       | BS10-147 | 3.2  | -2.2 | -2.7 | 3.0  | -1.5 | -2.0 | 2.8  | 0.1  | 3.7  | -3.3 | -3.5 | 3.7  | -2.1 | -3.1 | 3.5  | 1.1  |
| Fe6(trans)                       | BS10-147 | 3.2  | -2.1 | -2.6 | 3.0  | -2.3 | -1.3 | 2.7  | 0.1  | -3.5 | 3.8  | 3.8  | 3.8  | -3.4 | -3.5 | -3.4 | 2.3  |
| Fe7(trans)                       | BS10-147 | 3.1  | -2.1 | -2.2 | 3.1  | -2.6 | -1.1 | 2.6  | 0.0  | 3.7  | -2.7 | -3.0 | 3.6  | -3.4 | -3.0 | 3.6  | 1.0  |
| <b>End-on cis-HNNH binding</b>   |          |      |      |      |      |      |      |      |      |      |      |      |      |      |      |      |      |
| MoFe6                            | BS7-235  | 3.0  | -2.5 | -2.6 | 2.8  | -2.9 | 2.0  | 2.5  | -0.6 | 3.5  | -3.4 | -3.4 | 3.5  | -3.5 | 3.2  | 3.4  | 1.7  |
| Fe2(cis)                         | BS10-147 | -3.2 | 2.1  | 3.0  | -2.9 | 2.5  | 2.4  | -2.5 | -0.3 | 3.7  | -3.6 | -3.7 | 3.6  | 3.5  | -3.7 | 3.6  | -2.4 |
| Fe3(cis)                         | BS10-146 | -3.3 | 2.9  | 2.0  | -2.8 | 2.6  | -2.5 | 2.6  | -0.2 | -3.7 | 3.7  | 2.4  | -3.6 | 3.4  | -3.5 | 3.4  | -0.7 |
| Fe4(cis)                         | BS7-235  | 3.3  | -2.7 | -2.9 | 1.4  | -2.8 | 2.3  | 2.5  | -0.2 | 3.8  | -3.6 | -3.6 | 2.1  | -3.6 | 3.4  | 3.4  | -1.0 |
| Fe5(cis)                         | BS7-235  | 3.2  | -3.0 | -3.0 | 2.5  | -2.8 | 1.8  | 2.3  | 0.0  | 3.6  | -3.8 | -3.8 | 3.4  | -3.6 | 3.3  | 3.4  | -1.0 |
| Fe6(cis)                         | BS10-135 | -3.2 | 2.7  | -2.9 | 2.8  | -2.5 | 1.4  | 2.7  | -0.1 | -3.7 | 3.6  | -3.7 | 3.5  | -3.5 | 2.1  | 3.5  | -0.8 |
| Fe7(cis)                         | BS7-235  | 3.2  | -2.8 | -2.4 | 2.9  | -2.8 | 2.0  | 0.9  | 0.0  | 3.7  | -3.7 | -3.5 | 3.6  | -3.5 | 3.3  | 2.2  | -0.7 |

<sup>a</sup> In this structure, one of the protons of HNNH has moved to S5A, whereas the ligand has taken a proton from Arg-96 (cf. Figure S2).

**Table S2.** Relative energies of the 35 BS states for some of the studied structures, obtained with TPSS (TP) or B3LYP(B3).

| BS state | Fe2(trans) |     | Fe6-HNNH2 |     | Fe6(trans) |     | Fe2(cis) |     | Fe6 |     | Fe6(HCA) |     | Fe3/4 | Fe4/5(5) |     | Fe3(S2A) | Fe3/7Fe4/5 |     | Fe2Fe6(3) | Fe2Fe6(5) |     |
|----------|------------|-----|-----------|-----|------------|-----|----------|-----|-----|-----|----------|-----|-------|----------|-----|----------|------------|-----|-----------|-----------|-----|
|          | TP         | B3  | TP        | B3  | TP         | B3  | TP       | B3  | TP  | B3  | TP       | B3  | TP    | TP       | B3  | B3       | TP         | B3  | TP        | TP        | TP  |
| BS1-567  | 86         | 186 | 101       | 161 |            | 220 | 97       | 179 |     | 254 | 44       | 35  | 83    | 64       | 218 | 207      |            |     | 56        |           |     |
| BS2-234  | 19         | 2   | 43        | 22  | 35         | 0   | 18       | 3   | 41  | 50  | 32       | 50  | 48    | 4        | 83  | 18       | 0          | 70  | 60        |           | 26  |
| BS3-123  | 55         | 8   | 5         | 112 | 37         | 32  | 55       | 7   | 47  | 113 | 58       | 59  | 72    | 67       | 119 | 31       | 57         | 104 | 56        |           | 71  |
| BS3-124  | 44         | 14  | 53        | 67  |            | 20  | 55       | 11  | 66  | 70  | 44       | 123 | 66    | 40       | 101 | 55       | 61         | 114 | 48        |           | 65  |
| BS3-134  | 64         | 32  | 48        | 30  | 43         | 11  | 68       | 44  | 71  | 78  | 44       | 36  | 73    | 28       | 88  | 73       | 58         | 69  | 68        |           | 39  |
| BS4-257  | 79         | 149 | 55        | 86  | 58         | 91  | 80       | 135 | 71  | 124 | 53       | 112 | 25    | 24       | 76  | 134      | 44         | 69  | 67        |           | 39  |
| BS4-356  | 30         | 64  | 44        | 74  | 33         | 68  | 27       | 69  |     | 131 | 54       | 138 | 55    | 20       | 80  | 123      | 45         | 77  | 51        |           | 0   |
| BS4-467  | 41         | 95  | 63        | 95  |            | 158 | 38       | 90  | 78  | 198 |          |     | 64    | 48       | 216 | 161      | 38         | 107 | 0         |           | 90  |
| BS5-256  |            | 120 | 44        | 105 | 58         | 108 |          | 137 |     | 153 |          |     | 54    | 64       | 140 | 162      |            |     | 69        |           | 0   |
| BS5-267  |            | 145 | 68        | 94  |            | 167 |          | 145 | 90  | 202 |          |     | 50    | 22       | 132 | 193      |            |     | 53        |           | 115 |
| BS5-357  | 45         | 89  | 49        | 74  | 55         | 127 | 51       | 86  | 81  | 155 | 57       | 122 | 61    | 47       | 117 | 148      |            |     | 51        |           | 60  |
| BS5-367  | 53         | 86  | 77        | 97  | 32         | 194 | 46       | 87  | 90  | 187 | 80       | 194 | 54    | 32       | 113 | 186      | 53         | 196 | 37        |           | 60  |
| BS5-456  | 51         | 93  | 76        | 110 |            | 89  | 50       | 120 | 77  | 224 | 71       | 187 | 63    | 78       | 200 | 130      |            |     | 56        |           | 83  |
| BS5-457  | 59         | 94  | 53        | 97  | 45         | 96  | 59       | 96  |     | 229 | 56       | 142 | 84    | 8        | 201 | 117      | 77         | 123 | 56        |           | 54  |
| BS6-156  | 18         | 72  | 19        | 62  | 29         | 69  | 17       | 69  | 39  | 118 | 35       | 159 | 19    |          | 110 | 140      | 20         | 46  | 16        |           | 66  |
| BS6-157  | 8          | 62  | 21        | 33  | 14         | 75  | 6        | 55  | 34  | 150 | 16       | 91  | 45    | 4        | 107 | 138      | 33         | 147 | 16        |           | 37  |
| BS6-167  | 22         | 87  | 36        | 117 | 34         | 123 | 17       | 85  | 69  | 118 |          |     | 53    | 26       | 105 | 132      | 18         | 36  | 0         |           | 0   |
| BS7-235  | 32         | 24  | 17        | 10  |            | 48  | 34       | 89  | 51  | 0   | 8        | 19  | 0     | 0        | 0   | 0        | 19         | 0   | 3         |           | 0   |
| BS7-247  | 45         | 27  | 8         | 8   | 45         | 56  | 40       | 29  | 51  | 92  | 38       | 124 | 33    | 8        | 122 | 47       | 38         | 62  | 77        |           | 49  |
| BS7-346  | 3          | 15  | 5         | 36  |            | 41  | 1        | 14  | 36  | 85  | 65       | 87  | 75    | 50       | 125 | 53       | 38         | 67  | 0         |           | 67  |
| BS8-236  | 28         | 0   | 11        | 51  |            | 51  | 26       | 0   | 86  | 58  |          | 223 | 52    | 23       | 83  | 72       | 67         | 73  | 40        |           | 74  |
| BS8-237  | 42         | 79  | 40        | 24  | 49         | 64  | 46       | 97  | 66  | 45  | 42       | 85  | 13    | 9        | 49  | 66       |            |     | 40        |           | 40  |
| BS8-245  | 49         | 74  | 45        | 33  | 55         | 67  | 48       | 128 | 87  | 108 | 54       | 109 | 49    | 65       | 94  | 70       | 38         | 56  | 62        |           | 75  |
| BS8-246  | 31         | 15  | 13        | 87  |            | 49  | 32       | 9   | 122 | 164 | 64       | 171 | 53    | 68       | 139 | 90       |            |     | 52        |           | 87  |
| BS8-345  | 18         | 18  | 19        | 9   | 45         | 18  | 17       | 16  | 51  | 113 | 46       | 79  | 76    | 61       | 122 | 70       | 80         | 51  | 31        |           | 43  |
| BS8-347  | 17         | 16  | 14        | 4   | 41         | 64  | 16       | 13  | 41  | 141 | 46       | 86  | 76    | 79       | 156 | 74       |            |     | 33        |           | 37  |
| BS9-126  | 26         | 28  | 47        | 86  | 53         | 87  | 25       | 26  | 75  | 109 | 45       | 140 | 86    | 60       | 102 | 107      | 95         | 143 | 29        |           | 90  |
| BS9-137  | 33         | 44  | 38        | 28  | 45         | 85  | 34       | 41  | 73  | 166 | 42       | 97  | 71    | 45       | 79  | 105      | 25         |     | 65        |           | 68  |
| BS9-145  | 29         | 25  | 38        | 17  | 37         | 49  | 26       | 23  | 72  | 118 | 37       | 20  | 43    | 31       | 96  | 95       |            |     | 54        |           | 58  |
| BS10-125 | 18         | 18  | 28        | 6   | 13         | 29  | 14       | 17  | 42  | 59  | 14       | 12  | 49    | 22       | 65  | 41       | 69         | 50  | 21        |           | 38  |
| BS10-127 | 15         | 40  | 24        | 7   | 15         | 44  | 16       | 42  | 32  | 82  | 14       | 55  | 53    | 35       | 75  | 63       | 66         | 55  | 25        |           | 41  |
| BS10-135 | 5          | 20  | 5         | 4   | 0          | 32  | 5        | 15  | 43  | 79  | 0        | 0   | 46    | 12       | 59  | 60       | 27         | 76  | 37        |           | 64  |
| BS10-136 | 33         | 26  | 29        | 54  | 56         | 47  | 32       | 29  | 46  | 85  | 67       | 140 | 38    | 20       | 38  | 86       | 48         | 29  | 74        |           | 50  |
| BS10-146 | 26         | 20  | 26        | 46  | 51         | 60  | 37       | 18  | 41  | 99  | 20       | 84  | 45    | 3        | 115 | 91       | 44         | 44  | 4         |           | 37  |
| BS10-147 | 0          | 9   | 0         | 0   | 6          | 54  | 0        | 10  | 0   | 120 | 8        | 58  | 22    | 22       | 112 | 70       | 24         | 86  | 0         |           | 21  |

**Figure S1.** The QM/MM geometry of the Fe3/4 structure.

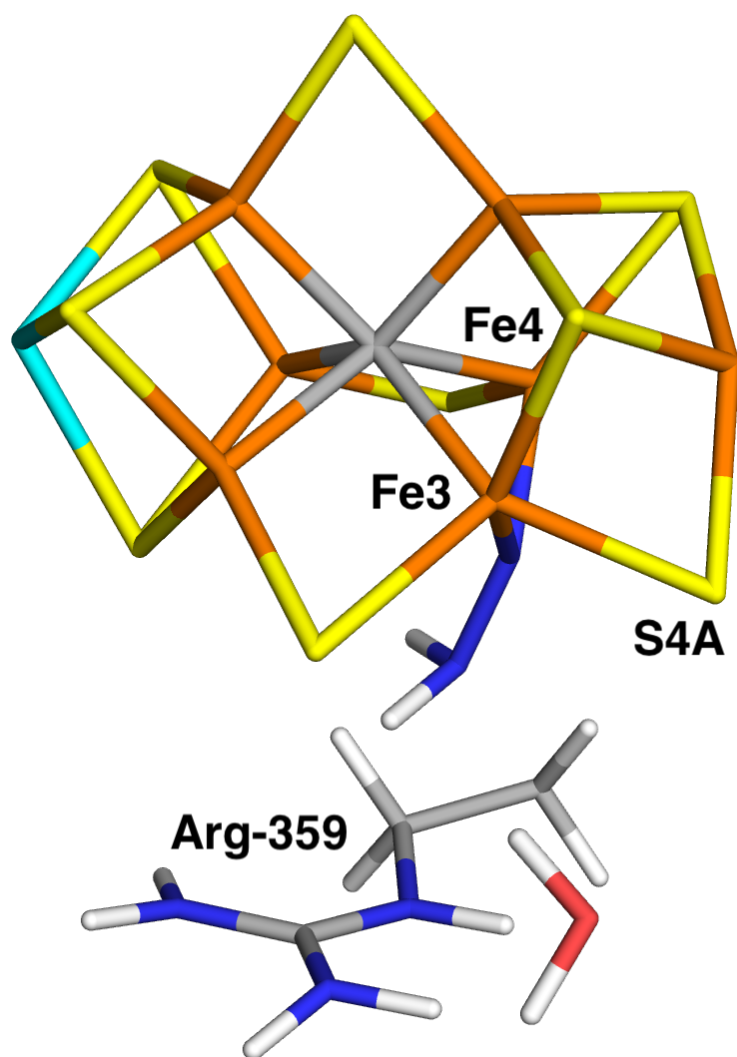

**Figure S2.** The QM/MM geometry of the Fe2/6Fe3/7tr structure.

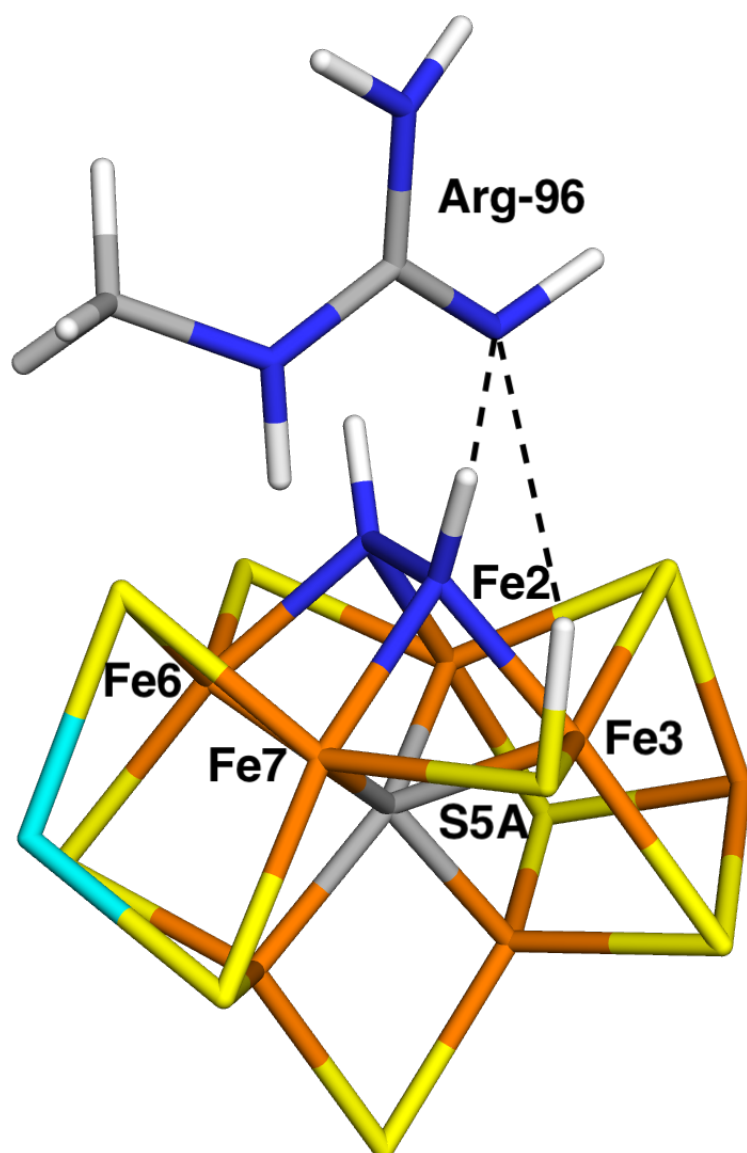

**Table S3.** Coordinates of the best structures in PDB format.

| Fe6(HCA) |    |   |     | REMARK Energies (QM/MM, QM+ptch) = -17129.752558 -16290.129409 -5.284382 H |        |                |
|----------|----|---|-----|----------------------------------------------------------------------------|--------|----------------|
| ATOM     |    |   |     |                                                                            |        |                |
| ATOM     | 1  | H | ??? | 1                                                                          | 3.500  | 2.240 -29.687  |
| ATOM     | 2  | C | ??? | 1                                                                          | 3.906  | 2.095 -30.706  |
| ATOM     | 3  | H | ??? | 1                                                                          | 5.011  | 2.115 -30.641  |
| ATOM     | 4  | H | ??? | 1                                                                          | 3.594  | 1.112 -31.093  |
| ATOM     | 5  | N | ??? | 1                                                                          | 3.476  | 3.148 -31.617  |
| ATOM     | 6  | H | ??? | 1                                                                          | 3.968  | 4.049 -31.522  |
| ATOM     | 7  | C | ??? | 1                                                                          | 2.847  | 2.926 -32.785  |
| ATOM     | 8  | N | ??? | 1                                                                          | 1.989  | 1.881 -32.911  |
| ATOM     | 9  | H | ??? | 1                                                                          | 1.813  | 1.274 -32.108  |
| ATOM     | 10 | H | ??? | 1                                                                          | 1.787  | 1.493 -33.843  |
| ATOM     | 11 | N | ??? | 1                                                                          | 3.066  | 3.743 -33.817  |
| ATOM     | 12 | H | ??? | 1                                                                          | 3.624  | 4.614 -33.675  |
| ATOM     | 13 | H | ??? | 1                                                                          | 2.416  | 3.767 -34.609  |
| ATOM     | 14 | H | ??? | 1                                                                          | 7.276  | 1.562 -41.618  |
| ATOM     | 15 | C | ??? | 1                                                                          | 7.581  | 2.030 -40.684  |
| ATOM     | 16 | N | ??? | 1                                                                          | 8.438  | 3.113 -40.698  |
| ATOM     | 17 | C | ??? | 1                                                                          | 8.511  | 3.514 -39.434  |
| ATOM     | 18 | H | ??? | 1                                                                          | 9.078  | 4.358 -39.042  |
| ATOM     | 19 | N | ??? | 1                                                                          | 7.746  | 2.736 -38.622  |
| ATOM     | 20 | H | ??? | 1                                                                          | 7.595  | 2.940 -37.616  |
| ATOM     | 21 | C | ??? | 1                                                                          | 7.128  | 1.786 -39.401  |
| ATOM     | 22 | H | ??? | 1                                                                          | 6.433  | 1.057 -38.985  |
| ATOM     | 23 | H | ??? | 1                                                                          | 2.978  | 9.557 -40.118  |
| ATOM     | 24 | C | ??? | 1                                                                          | 3.104  | 8.705 -39.422  |
| ATOM     | 25 | H | ??? | 1                                                                          | 2.509  | 7.840 -39.762  |
| ATOM     | 26 | H | ??? | 1                                                                          | 2.796  | 9.023 -38.413  |
| ATOM     | 27 | S | ??? | 1                                                                          | 4.918  | 8.301 -39.430  |
| ATOM     | 28 | H | ??? | 1                                                                          | 6.637  | 8.643 -42.923  |
| ATOM     | 29 | C | ??? | 1                                                                          | 7.435  | 7.842 -42.957  |
| ATOM     | 30 | H | ??? | 1                                                                          | 8.006  | 8.022 -43.881  |
| ATOM     | 31 | H | ??? | 1                                                                          | 8.092  | 7.980 -42.081  |
| ATOM     | 32 | C | ??? | 1                                                                          | 6.837  | 6.419 -43.009  |
| ATOM     | 33 | O | ??? | 1                                                                          | 7.262  | 5.638 -43.871  |
| ATOM     | 34 | N | ??? | 1                                                                          | 5.923  | 6.124 -42.064  |
| ATOM     | 35 | H | ??? | 1                                                                          | 5.588  | 6.846 -41.409  |
| ATOM     | 36 | C | ??? | 1                                                                          | 5.391  | 4.763 -41.928  |
| ATOM     | 37 | H | ??? | 1                                                                          | 6.246  | 4.093 -42.128  |
| ATOM     | 38 | C | ??? | 1                                                                          | 4.922  | 4.521 -40.489  |
| ATOM     | 39 | H | ??? | 1                                                                          | 4.592  | 3.469 -40.417  |
| ATOM     | 40 | H | ??? | 1                                                                          | 5.757  | 4.667 -39.771  |
| ATOM     | 41 | O | ??? | 1                                                                          | 3.807  | 5.335 -40.100  |
| ATOM     | 42 | H | ??? | 1                                                                          | 4.172  | 6.176 -39.724  |
| ATOM     | 43 | H | ??? | 1                                                                          | 4.607  | 4.494 -42.656  |
| ATOM     | 44 | H | ??? | 1                                                                          | 13.632 | 11.342 -31.927 |
| ATOM     | 45 | C | ??? | 1                                                                          | 12.719 | 10.654 -31.970 |
| ATOM     | 46 | H | ??? | 1                                                                          | 12.873 | 9.949 -31.129  |
| ATOM     | 47 | H | ??? | 1                                                                          | 11.736 | 11.192 -31.788 |
| ATOM     | 48 | C | ??? | 1                                                                          | 12.887 | 9.818 -33.252  |
| ATOM     | 49 | O | ??? | 1                                                                          | 14.017 | 9.620 -33.703  |
| ATOM     | 50 | N | ??? | 1                                                                          | 11.789 | 9.210 -33.775  |
| ATOM     | 51 | H | ??? | 1                                                                          | 10.829 | 9.423 -33.469  |
| ATOM     | 52 | C | ??? | 1                                                                          | 11.956 | 8.128 -34.737  |
| ATOM     | 53 | H | ??? | 1                                                                          | 12.913 | 7.632 -34.528  |
| ATOM     | 54 | H | ??? | 1                                                                          | 11.128 | 7.417 -34.566  |
| ATOM     | 55 | C | ??? | 1                                                                          | 11.982 | 8.526 -36.221  |
| ATOM     | 56 | O | ??? | 1                                                                          | 12.994 | 8.407 -36.914  |
| ATOM     | 57 | N | ??? | 1                                                                          | 10.779 | 8.969 -36.715  |
| ATOM     | 58 | H | ??? | 1                                                                          | 9.939  | 8.819 -36.131  |
| ATOM     | 59 | C | ??? | 1                                                                          | 10.594 | 9.155 -38.142  |
| ATOM     | 60 | H | ??? | 1                                                                          | 11.591 | 9.303 -38.593  |
| ATOM     | 61 | H | ??? | 1                                                                          | 10.153 | 8.254 -38.606  |
| ATOM     | 62 | C | ??? | 1                                                                          | 9.676  | 10.291 -38.578 |
| ATOM     | 63 | O | ??? | 1                                                                          | 9.529  | 10.513 -39.786 |
| ATOM     | 64 | N | ??? | 1                                                                          | 9.053  | 11.005 -37.603 |
| ATOM     | 65 | H | ??? | 1                                                                          | 9.117  | 10.677 -36.631 |
| ATOM     | 66 | C | ??? | 1                                                                          | 8.100  | 12.061 -37.928 |
| ATOM     | 67 | H | ??? | 1                                                                          | 8.334  | 12.410 -38.945 |
| ATOM     | 68 | H | ??? | 1                                                                          | 7.043  | 11.659 -37.929 |
| ATOM     | 69 | C | ??? | 1                                                                          | 8.207  | 13.251 -36.958 |
| ATOM     | 70 | O | ??? | 1                                                                          | 8.476  | 14.390 -37.364 |
| ATOM     | 71 | N | ??? | 1                                                                          | 7.918  | 12.931 -35.677 |
| ATOM     | 72 | H | ??? | 1                                                                          | 7.748  | 11.944 -35.440 |
| ATOM     | 73 | C | ??? | 1                                                                          | 7.844  | 13.898 -34.572 |
| ATOM     | 74 | H | ??? | 1                                                                          | 6.991  | 14.578 -34.788 |
| ATOM     | 75 | C | ??? | 1                                                                          | 7.531  | 13.116 -33.288 |
| ATOM     | 76 | H | ??? | 1                                                                          | 8.318  | 12.354 -33.114 |
| ATOM     | 77 | H | ??? | 1                                                                          | 7.559  | 13.819 -32.433 |
| ATOM     | 78 | C | ??? | 1                                                                          | 6.159  | 12.415 -33.323 |
| ATOM     | 79 | H | ??? | 1                                                                          | 5.357  | 13.183 -33.320 |
| ATOM     | 80 | H | ??? | 1                                                                          | 6.037  | 11.822 -34.252 |
| ATOM     | 81 | C | ??? | 1                                                                          | 5.963  | 11.462 -32.142 |
| ATOM     | 82 | H | ??? | 1                                                                          | 6.654  | 10.600 -32.234 |
| ATOM     | 83 | H | ??? | 1                                                                          | 6.189  | 11.992 -31.195 |
| ATOM     | 84 | N | ??? | 1                                                                          | 4.572  | 10.996 -32.105 |
| ATOM     | 85 | H | ??? | 1                                                                          | 3.963  | 11.178 -32.917 |
| ATOM     | 86 | C | ??? | 1                                                                          | 3.988  | 10.366 -31.079 |
| ATOM     | 87 | N | ??? | 1                                                                          | 4.663  | 10.163 -29.937 |
| ATOM     | 88 | H | ??? | 1                                                                          | 5.611  | 10.533 -29.826 |
| ATOM     | 89 | H | ??? | 1                                                                          | 4.323  | 9.520 -29.215  |
| ATOM     | 90 | N | ??? | 1                                                                          | 2.709  | 9.938 -31.210  |
| ATOM     | 91 | H | ??? | 1                                                                          | 2.243  | 10.183 -32.094 |
| ATOM     | 92 | H | ??? | 1                                                                          | 2.097  | 9.951 -30.391  |
| ATOM     | 93 | H | ??? | 1                                                                          | 8.731  | 14.564 -34.480 |
| ATOM     | 94 | H | ??? | 1                                                                          | 8.402  | 7.469 -28.176  |
| ATOM     | 95 | C | ??? | 1                                                                          | 9.346  | 7.522 -28.725  |
| ATOM     | 96 | N | ??? | 1                                                                          | 9.536  | 6.791 -29.884  |
| ATOM     | 97 | C | ??? | 1                                                                          | 10.842 | 6.862 -30.166  |
| ATOM     | 98 | H | ??? | 1                                                                          | 11.343 | 6.389 -31.011  |
| ATOM     | 99 | N | ??? | 1                                                                          | 11.483 | 7.626 -29.249  |

|      |     |    |     |   |        |        |         |
|------|-----|----|-----|---|--------|--------|---------|
| ATOM | 100 | H  | ??? | 1 | 12.495 | 7.849  | -29.266 |
| ATOM | 101 | C  | ??? | 1 | 10.555 | 8.051  | -28.319 |
| ATOM | 102 | H  | ??? | 1 | 10.834 | 8.719  | -27.505 |
| ATOM | 103 | O  | ??? | 1 | 10.648 | 5.253  | -25.654 |
| ATOM | 104 | C  | ??? | 1 | 10.944 | 4.627  | -26.735 |
| ATOM | 105 | O  | ??? | 1 | 12.096 | 4.379  | -27.167 |
| ATOM | 106 | C  | ??? | 1 | 9.736  | 4.221  | -27.610 |
| ATOM | 107 | H  | ??? | 1 | 8.870  | 4.020  | -26.953 |
| ATOM | 108 | H  | ??? | 1 | 9.484  | 5.132  | -28.179 |
| ATOM | 109 | C  | ??? | 1 | 9.914  | 3.093  | -28.634 |
| ATOM | 110 | H  | ??? | 1 | 10.887 | 3.196  | -29.142 |
| ATOM | 111 | H  | ??? | 1 | 9.916  | 2.101  | -28.137 |
| ATOM | 112 | C  | ??? | 1 | 8.824  | 3.120  | -29.749 |
| ATOM | 113 | O  | ??? | 1 | 9.238  | 4.082  | -30.746 |
| ATOM | 114 | H  | ??? | 1 | 9.291  | 3.680  | -31.766 |
| ATOM | 115 | C  | ??? | 1 | 7.507  | 3.632  | -29.121 |
| ATOM | 116 | O  | ??? | 1 | 7.111  | 4.794  | -29.520 |
| ATOM | 117 | O  | ??? | 1 | 6.903  | 2.972  | -28.247 |
| ATOM | 118 | C  | ??? | 1 | 8.570  | 1.740  | -30.392 |
| ATOM | 119 | H  | ??? | 1 | 8.109  | 1.080  | -29.636 |
| ATOM | 120 | H  | ??? | 1 | 7.818  | 1.883  | -31.199 |
| ATOM | 121 | C  | ??? | 1 | 9.800  | 1.030  | -31.019 |
| ATOM | 122 | O  | ??? | 1 | 10.562 | 1.759  | -31.739 |
| ATOM | 123 | O  | ??? | 1 | 9.918  | -0.201 | -30.831 |
| ATOM | 124 | FE | ??? | 1 | 7.919  | 7.752  | -33.107 |
| ATOM | 125 | MO | ??? | 1 | 7.993  | 5.792  | -31.254 |
| ATOM | 126 | FE | ??? | 1 | 6.995  | 8.481  | -35.338 |
| ATOM | 127 | FE | ??? | 1 | 5.813  | 6.429  | -32.629 |
| ATOM | 128 | FE | ??? | 1 | 7.932  | 5.099  | -33.834 |
| ATOM | 129 | FE | ??? | 1 | 6.847  | 5.999  | -36.046 |
| ATOM | 130 | FE | ??? | 1 | 5.514  | 7.776  | -37.309 |
| ATOM | 131 | FE | ??? | 1 | 4.871  | 7.134  | -34.849 |
| ATOM | 132 | C  | ??? | 1 | 6.738  | 6.827  | -34.294 |
| ATOM | 133 | S  | ??? | 1 | 7.736  | 7.663  | -37.360 |
| ATOM | 134 | S  | ??? | 1 | 9.609  | 6.325  | -32.920 |
| ATOM | 135 | S  | ??? | 1 | 4.739  | 5.702  | -36.646 |
| ATOM | 136 | S  | ??? | 1 | 7.977  | 4.166  | -35.895 |
| ATOM | 137 | S  | ??? | 1 | 8.510  | 9.631  | -34.196 |
| ATOM | 138 | S  | ??? | 1 | 6.429  | 4.298  | -32.308 |
| ATOM | 139 | S  | ??? | 1 | 4.914  | 9.276  | -35.636 |
| ATOM | 140 | S  | ??? | 1 | 6.748  | 7.812  | -31.168 |
| ATOM | 141 | S  | ??? | 1 | 3.666  | 6.744  | -32.982 |
| ATOM | 142 | N  | ??? | 1 | 8.936  | 3.667  | -33.235 |
| ATOM | 143 | H  | ??? | 1 | 9.852  | 1.950  | -33.247 |
| ATOM | 144 | N  | ??? | 1 | 9.292  | 2.623  | -33.836 |
| ATOM | 145 | H  | ??? | 1 | 9.065  | 2.536  | -34.853 |
| ATOM | 146 | O  | ??? | 1 | 4.507  | 5.540  | -29.443 |
| ATOM | 147 | H  | ??? | 1 | 5.462  | 5.257  | -29.486 |
| ATOM | 148 | H  | ??? | 1 | 4.439  | 6.273  | -30.095 |
| ATOM | 149 | O  | ??? | 1 | 1.061  | 8.394  | -34.250 |
| ATOM | 150 | H  | ??? | 1 | 1.915  | 8.051  | -33.887 |
| ATOM | 151 | H  | ??? | 1 | 0.548  | 8.690  | -33.441 |
| END  |     |    |     |   |        |        |         |

Fe6

REMARK Energies (QM/MM, QM+ptch) = -17129.745891 -16290.117291

|      |    |   |     |   |        |        |         |
|------|----|---|-----|---|--------|--------|---------|
| ATOM | 1  | H | ??? | 1 | 3.496  | 2.241  | -29.688 |
| ATOM | 2  | C | ??? | 1 | 3.896  | 2.098  | -30.711 |
| ATOM | 3  | H | ??? | 1 | 5.002  | 2.103  | -30.655 |
| ATOM | 4  | H | ??? | 1 | 3.569  | 1.120  | -31.101 |
| ATOM | 5  | N | ??? | 1 | 3.469  | 3.163  | -31.609 |
| ATOM | 6  | H | ??? | 1 | 3.961  | 4.062  | -31.495 |
| ATOM | 7  | C | ??? | 1 | 2.856  | 2.958  | -32.789 |
| ATOM | 8  | N | ??? | 1 | 2.001  | 1.913  | -32.938 |
| ATOM | 9  | H | ??? | 1 | 1.825  | 1.293  | -32.145 |
| ATOM | 10 | H | ??? | 1 | 1.805  | 1.535  | -33.876 |
| ATOM | 11 | N | ??? | 1 | 3.086  | 3.793  | -33.804 |
| ATOM | 12 | H | ??? | 1 | 3.634  | 4.667  | -33.635 |
| ATOM | 13 | H | ??? | 1 | 2.449  | 3.826  | -34.606 |
| ATOM | 14 | H | ??? | 1 | 7.279  | 1.558  | -41.619 |
| ATOM | 15 | C | ??? | 1 | 7.594  | 2.016  | -40.683 |
| ATOM | 16 | N | ??? | 1 | 8.457  | 3.094  | -40.689 |
| ATOM | 17 | C | ??? | 1 | 8.574  | 3.450  | -39.415 |
| ATOM | 18 | H | ??? | 1 | 9.155  | 4.281  | -39.014 |
| ATOM | 19 | N | ??? | 1 | 7.834  | 2.644  | -38.605 |
| ATOM | 20 | H | ??? | 1 | 7.699  | 2.821  | -37.592 |
| ATOM | 21 | C | ??? | 1 | 7.181  | 1.730  | -39.397 |
| ATOM | 22 | H | ??? | 1 | 6.491  | 0.995  | -38.983 |
| ATOM | 23 | H | ??? | 1 | 2.981  | 9.557  | -40.119 |
| ATOM | 24 | C | ??? | 1 | 3.115  | 8.706  | -39.423 |
| ATOM | 25 | H | ??? | 1 | 2.538  | 7.831  | -39.770 |
| ATOM | 26 | H | ??? | 1 | 2.783  | 9.021  | -38.420 |
| ATOM | 27 | S | ??? | 1 | 4.941  | 8.335  | -39.405 |
| ATOM | 28 | H | ??? | 1 | 6.638  | 8.643  | -42.923 |
| ATOM | 29 | C | ??? | 1 | 7.436  | 7.841  | -42.958 |
| ATOM | 30 | H | ??? | 1 | 8.006  | 8.022  | -43.881 |
| ATOM | 31 | H | ??? | 1 | 8.092  | 7.980  | -42.081 |
| ATOM | 32 | C | ??? | 1 | 6.837  | 6.419  | -43.009 |
| ATOM | 33 | O | ??? | 1 | 7.258  | 5.639  | -43.874 |
| ATOM | 34 | N | ??? | 1 | 5.924  | 6.124  | -42.063 |
| ATOM | 35 | H | ??? | 1 | 5.599  | 6.846  | -41.401 |
| ATOM | 36 | C | ??? | 1 | 5.390  | 4.764  | -41.924 |
| ATOM | 37 | H | ??? | 1 | 6.245  | 4.093  | -42.126 |
| ATOM | 38 | C | ??? | 1 | 4.930  | 4.525  | -40.483 |
| ATOM | 39 | H | ??? | 1 | 4.591  | 3.477  | -40.408 |
| ATOM | 40 | H | ??? | 1 | 5.774  | 4.662  | -39.771 |
| ATOM | 41 | O | ??? | 1 | 3.826  | 5.349  | -40.081 |
| ATOM | 42 | H | ??? | 1 | 4.200  | 6.184  | -39.698 |
| ATOM | 43 | H | ??? | 1 | 4.607  | 4.495  | -42.654 |
| ATOM | 44 | H | ??? | 1 | 13.632 | 11.344 | -31.927 |
| ATOM | 45 | C | ??? | 1 | 12.720 | 10.656 | -31.972 |
| ATOM | 46 | H | ??? | 1 | 12.875 | 9.950  | -31.132 |
| ATOM | 47 | H | ??? | 1 | 11.737 | 11.192 | -31.789 |
| ATOM | 48 | C | ??? | 1 | 12.894 | 9.821  | -33.253 |
| ATOM | 49 | O | ??? | 1 | 14.028 | 9.614  | -33.692 |



|      |     |    |     |   |        |        |         |
|------|-----|----|-----|---|--------|--------|---------|
| ATOM | 50  | N  | ??? | 1 | 11.797 | 9.223  | -33.783 |
| ATOM | 51  | H  | ??? | 1 | 10.835 | 9.455  | -33.493 |
| ATOM | 52  | C  | ??? | 1 | 11.955 | 8.139  | -34.743 |
| ATOM | 53  | H  | ??? | 1 | 12.914 | 7.642  | -34.537 |
| ATOM | 54  | H  | ??? | 1 | 11.124 | 7.433  | -34.565 |
| ATOM | 55  | C  | ??? | 1 | 11.974 | 8.528  | -36.230 |
| ATOM | 56  | O  | ??? | 1 | 12.987 | 8.407  | -36.924 |
| ATOM | 57  | N  | ??? | 1 | 10.769 | 8.960  | -36.723 |
| ATOM | 58  | H  | ??? | 1 | 9.931  | 8.817  | -36.132 |
| ATOM | 59  | C  | ??? | 1 | 10.575 | 9.143  | -38.148 |
| ATOM | 60  | H  | ??? | 1 | 11.571 | 9.264  | -38.609 |
| ATOM | 61  | H  | ??? | 1 | 10.102 | 8.251  | -38.598 |
| ATOM | 62  | C  | ??? | 1 | 9.680  | 10.299 | -38.583 |
| ATOM | 63  | O  | ??? | 1 | 9.550  | 10.537 | -39.790 |
| ATOM | 64  | N  | ??? | 1 | 9.050  | 11.004 | -37.606 |
| ATOM | 65  | H  | ??? | 1 | 9.096  | 10.658 | -36.639 |
| ATOM | 66  | C  | ??? | 1 | 8.099  | 12.061 | -37.929 |
| ATOM | 67  | H  | ??? | 1 | 8.333  | 12.411 | -38.945 |
| ATOM | 68  | H  | ??? | 1 | 7.043  | 11.659 | -37.929 |
| ATOM | 69  | C  | ??? | 1 | 8.208  | 13.252 | -36.959 |
| ATOM | 70  | O  | ??? | 1 | 8.477  | 14.391 | -37.365 |
| ATOM | 71  | N  | ??? | 1 | 7.919  | 12.932 | -35.677 |
| ATOM | 72  | H  | ??? | 1 | 7.751  | 11.946 | -35.440 |
| ATOM | 73  | C  | ??? | 1 | 7.845  | 13.900 | -34.573 |
| ATOM | 74  | H  | ??? | 1 | 6.992  | 14.579 | -34.789 |
| ATOM | 75  | C  | ??? | 1 | 7.532  | 13.117 | -33.289 |
| ATOM | 76  | H  | ??? | 1 | 8.316  | 12.350 | -33.121 |
| ATOM | 77  | H  | ??? | 1 | 7.567  | 13.817 | -32.432 |
| ATOM | 78  | C  | ??? | 1 | 6.156  | 12.424 | -33.322 |
| ATOM | 79  | H  | ??? | 1 | 5.358  | 13.195 | -33.292 |
| ATOM | 80  | H  | ??? | 1 | 6.019  | 11.855 | -34.264 |
| ATOM | 81  | C  | ??? | 1 | 5.970  | 11.443 | -32.164 |
| ATOM | 82  | H  | ??? | 1 | 6.652  | 10.577 | -32.289 |
| ATOM | 83  | H  | ??? | 1 | 6.217  | 11.946 | -31.207 |
| ATOM | 84  | N  | ??? | 1 | 4.575  | 10.993 | -32.115 |
| ATOM | 85  | H  | ??? | 1 | 3.966  | 11.167 | -32.929 |
| ATOM | 86  | C  | ??? | 1 | 3.996  | 10.357 | -31.090 |
| ATOM | 87  | N  | ??? | 1 | 4.678  | 10.137 | -29.955 |
| ATOM | 88  | H  | ??? | 1 | 5.628  | 10.505 | -29.846 |
| ATOM | 89  | H  | ??? | 1 | 4.338  | 9.494  | -29.233 |
| ATOM | 90  | N  | ??? | 1 | 2.713  | 9.940  | -31.214 |
| ATOM | 91  | H  | ??? | 1 | 2.242  | 10.191 | -32.094 |
| ATOM | 92  | H  | ??? | 1 | 2.106  | 9.946  | -30.391 |
| ATOM | 93  | H  | ??? | 1 | 8.731  | 14.565 | -34.480 |
| ATOM | 94  | H  | ??? | 1 | 8.405  | 7.460  | -28.186 |
| ATOM | 95  | C  | ??? | 1 | 9.349  | 7.499  | -28.749 |
| ATOM | 96  | N  | ??? | 1 | 9.550  | 6.767  | -29.911 |
| ATOM | 97  | C  | ??? | 1 | 10.852 | 6.867  | -30.198 |
| ATOM | 98  | H  | ??? | 1 | 11.354 | 6.417  | -31.055 |
| ATOM | 99  | N  | ??? | 1 | 11.484 | 7.640  | -29.281 |
| ATOM | 100 | H  | ??? | 1 | 12.492 | 7.877  | -29.297 |
| ATOM | 101 | C  | ??? | 1 | 10.551 | 8.047  | -28.348 |
| ATOM | 102 | H  | ??? | 1 | 10.823 | 8.714  | -27.531 |
| ATOM | 103 | O  | ??? | 1 | 10.666 | 5.259  | -25.638 |
| ATOM | 104 | C  | ??? | 1 | 10.949 | 4.627  | -26.716 |
| ATOM | 105 | O  | ??? | 1 | 12.095 | 4.360  | -27.156 |
| ATOM | 106 | C  | ??? | 1 | 9.735  | 4.236  | -27.586 |
| ATOM | 107 | H  | ??? | 1 | 8.847  | 4.118  | -26.940 |
| ATOM | 108 | H  | ??? | 1 | 9.543  | 5.120  | -28.218 |
| ATOM | 109 | C  | ??? | 1 | 9.877  | 3.044  | -28.535 |
| ATOM | 110 | H  | ??? | 1 | 10.864 | 3.075  | -29.025 |
| ATOM | 111 | H  | ??? | 1 | 9.829  | 2.083  | -27.985 |
| ATOM | 112 | C  | ??? | 1 | 8.806  | 3.075  | -29.663 |
| ATOM | 113 | O  | ??? | 1 | 9.275  | 3.989  | -30.687 |
| ATOM | 114 | H  | ??? | 1 | 9.879  | 3.365  | -31.279 |
| ATOM | 115 | C  | ??? | 1 | 7.496  | 3.630  | -29.096 |
| ATOM | 116 | O  | ??? | 1 | 7.133  | 4.779  | -29.543 |
| ATOM | 117 | O  | ??? | 1 | 6.869  | 2.987  | -28.223 |
| ATOM | 118 | C  | ??? | 1 | 8.555  | 1.715  | -30.342 |
| ATOM | 119 | H  | ??? | 1 | 8.155  | 0.988  | -29.614 |
| ATOM | 120 | H  | ??? | 1 | 7.788  | 1.875  | -31.129 |
| ATOM | 121 | C  | ??? | 1 | 9.806  | 1.137  | -31.034 |
| ATOM | 122 | O  | ??? | 1 | 10.551 | 2.014  | -31.632 |
| ATOM | 123 | O  | ??? | 1 | 9.984  | -0.094 | -31.005 |
| ATOM | 124 | FE | ??? | 1 | 5.889  | 6.434  | -32.645 |
| ATOM | 125 | MO | ??? | 1 | 8.037  | 5.712  | -31.319 |
| ATOM | 126 | FE | ??? | 1 | 7.788  | 5.100  | -33.868 |
| ATOM | 127 | FE | ??? | 1 | 8.010  | 7.723  | -33.148 |
| ATOM | 128 | FE | ??? | 1 | 4.833  | 7.262  | -34.759 |
| ATOM | 129 | FE | ??? | 1 | 6.803  | 6.120  | -36.061 |
| ATOM | 130 | FE | ??? | 1 | 5.342  | 7.875  | -37.202 |
| ATOM | 131 | FE | ??? | 1 | 6.972  | 8.557  | -35.337 |
| ATOM | 132 | C  | ??? | 1 | 6.690  | 6.891  | -34.315 |
| ATOM | 133 | S  | ??? | 1 | 7.671  | 7.694  | -37.367 |
| ATOM | 134 | S  | ??? | 1 | 9.644  | 6.182  | -33.013 |
| ATOM | 135 | S  | ??? | 1 | 4.614  | 5.864  | -36.541 |
| ATOM | 136 | S  | ??? | 1 | 7.817  | 4.243  | -35.998 |
| ATOM | 137 | S  | ??? | 1 | 8.554  | 9.649  | -34.178 |
| ATOM | 138 | S  | ??? | 1 | 6.377  | 4.302  | -32.321 |
| ATOM | 139 | S  | ??? | 1 | 4.810  | 9.364  | -35.501 |
| ATOM | 140 | S  | ??? | 1 | 6.892  | 7.782  | -31.186 |
| ATOM | 141 | S  | ??? | 1 | 3.717  | 6.762  | -32.889 |
| ATOM | 142 | N  | ??? | 1 | 8.651  | 3.461  | -33.715 |
| ATOM | 143 | H  | ??? | 1 | 10.346 | 2.470  | -33.658 |
| ATOM | 144 | N  | ??? | 1 | 9.892  | 3.368  | -33.883 |
| ATOM | 145 | H  | ??? | 1 | 10.495 | 4.214  | -34.016 |
| ATOM | 146 | O  | ??? | 1 | 4.513  | 5.538  | -29.470 |
| ATOM | 147 | H  | ??? | 1 | 5.467  | 5.266  | -29.533 |
| ATOM | 148 | H  | ??? | 1 | 4.399  | 6.201  | -30.189 |
| ATOM | 149 | O  | ??? | 1 | 1.081  | 8.392  | -34.244 |
| ATOM | 150 | H  | ??? | 1 | 1.946  | 8.072  | -33.886 |
| ATOM | 151 | H  | ??? | 1 | 0.567  | 8.684  | -33.433 |

END

Fe6-HNNH2

REMARK Energies (QM/MM, QM+ptch) = -17129.762036 -16290.139306

|      |     |   |     |   |        |        |         |
|------|-----|---|-----|---|--------|--------|---------|
| ATOM | 1   | H | ??? | 1 | 3.501  | 2.240  | -29.686 |
| ATOM | 2   | C | ??? | 1 | 3.912  | 2.095  | -30.704 |
| ATOM | 3   | H | ??? | 1 | 5.017  | 2.108  | -30.632 |
| ATOM | 4   | H | ??? | 1 | 3.597  | 1.114  | -31.094 |
| ATOM | 5   | N | ??? | 1 | 3.492  | 3.151  | -31.615 |
| ATOM | 6   | H | ??? | 1 | 3.966  | 4.059  | -31.499 |
| ATOM | 7   | C | ??? | 1 | 2.859  | 2.936  | -32.781 |
| ATOM | 8   | N | ??? | 1 | 2.000  | 1.892  | -32.911 |
| ATOM | 9   | H | ??? | 1 | 1.823  | 1.283  | -32.110 |
| ATOM | 10  | H | ??? | 1 | 1.798  | 1.506  | -33.844 |
| ATOM | 11  | N | ??? | 1 | 3.076  | 3.756  | -33.812 |
| ATOM | 12  | H | ??? | 1 | 3.640  | 4.622  | -33.669 |
| ATOM | 13  | H | ??? | 1 | 2.421  | 3.787  | -34.598 |
| ATOM | 14  | H | ??? | 1 | 7.275  | 1.561  | -41.620 |
| ATOM | 15  | C | ??? | 1 | 7.581  | 2.027  | -40.686 |
| ATOM | 16  | N | ??? | 1 | 8.439  | 3.110  | -40.699 |
| ATOM | 17  | C | ??? | 1 | 8.512  | 3.508  | -39.434 |
| ATOM | 18  | H | ??? | 1 | 9.080  | 4.350  | -39.039 |
| ATOM | 19  | N | ??? | 1 | 7.746  | 2.727  | -38.624 |
| ATOM | 20  | H | ??? | 1 | 7.592  | 2.931  | -37.620 |
| ATOM | 21  | C | ??? | 1 | 7.127  | 1.781  | -39.406 |
| ATOM | 22  | H | ??? | 1 | 6.431  | 1.052  | -38.991 |
| ATOM | 23  | H | ??? | 1 | 2.977  | 9.557  | -40.117 |
| ATOM | 24  | C | ??? | 1 | 3.101  | 8.705  | -39.421 |
| ATOM | 25  | H | ??? | 1 | 2.511  | 7.838  | -39.764 |
| ATOM | 26  | H | ??? | 1 | 2.784  | 9.023  | -38.414 |
| ATOM | 27  | S | ??? | 1 | 4.916  | 8.306  | -39.415 |
| ATOM | 28  | H | ??? | 1 | 6.637  | 8.643  | -42.923 |
| ATOM | 29  | C | ??? | 1 | 7.435  | 7.842  | -42.957 |
| ATOM | 30  | H | ??? | 1 | 8.006  | 8.022  | -43.881 |
| ATOM | 31  | H | ??? | 1 | 8.092  | 7.980  | -42.081 |
| ATOM | 32  | C | ??? | 1 | 6.837  | 6.419  | -43.008 |
| ATOM | 33  | O | ??? | 1 | 7.261  | 5.638  | -43.870 |
| ATOM | 34  | N | ??? | 1 | 5.923  | 6.124  | -42.063 |
| ATOM | 35  | H | ??? | 1 | 5.589  | 6.846  | -41.408 |
| ATOM | 36  | C | ??? | 1 | 5.390  | 4.763  | -41.927 |
| ATOM | 37  | H | ??? | 1 | 6.246  | 4.094  | -42.129 |
| ATOM | 38  | C | ??? | 1 | 4.924  | 4.520  | -40.488 |
| ATOM | 39  | H | ??? | 1 | 4.591  | 3.469  | -40.417 |
| ATOM | 40  | H | ??? | 1 | 5.762  | 4.661  | -39.772 |
| ATOM | 41  | O | ??? | 1 | 3.813  | 5.336  | -40.093 |
| ATOM | 42  | H | ??? | 1 | 4.180  | 6.175  | -39.716 |
| ATOM | 43  | H | ??? | 1 | 4.607  | 4.494  | -42.656 |
| ATOM | 44  | H | ??? | 1 | 13.632 | 11.342 | -31.927 |
| ATOM | 45  | C | ??? | 1 | 12.719 | 10.655 | -31.970 |
| ATOM | 46  | H | ??? | 1 | 12.873 | 9.949  | -31.129 |
| ATOM | 47  | H | ??? | 1 | 11.736 | 11.192 | -31.788 |
| ATOM | 48  | C | ??? | 1 | 12.891 | 9.820  | -33.252 |
| ATOM | 49  | O | ??? | 1 | 14.022 | 9.625  | -33.702 |
| ATOM | 50  | N | ??? | 1 | 11.796 | 9.212  | -33.780 |
| ATOM | 51  | H | ??? | 1 | 10.835 | 9.414  | -33.467 |
| ATOM | 52  | C | ??? | 1 | 11.970 | 8.131  | -34.742 |
| ATOM | 53  | H | ??? | 1 | 12.933 | 7.644  | -34.534 |
| ATOM | 54  | H | ??? | 1 | 11.151 | 7.411  | -34.569 |
| ATOM | 55  | C | ??? | 1 | 11.988 | 8.528  | -36.226 |
| ATOM | 56  | O | ??? | 1 | 12.995 | 8.405  | -36.925 |
| ATOM | 57  | N | ??? | 1 | 10.783 | 8.973  | -36.714 |
| ATOM | 58  | H | ??? | 1 | 9.946  | 8.824  | -36.126 |
| ATOM | 59  | C | ??? | 1 | 10.594 | 9.155  | -38.140 |
| ATOM | 60  | H | ??? | 1 | 11.590 | 9.305  | -38.594 |
| ATOM | 61  | H | ??? | 1 | 10.155 | 8.253  | -38.603 |
| ATOM | 62  | C | ??? | 1 | 9.672  | 10.289 | -38.577 |
| ATOM | 63  | O | ??? | 1 | 9.519  | 10.505 | -39.785 |
| ATOM | 64  | N | ??? | 1 | 9.054  | 11.007 | -37.603 |
| ATOM | 65  | H | ??? | 1 | 9.128  | 10.688 | -36.629 |
| ATOM | 66  | C | ??? | 1 | 8.100  | 12.062 | -37.928 |
| ATOM | 67  | H | ??? | 1 | 8.333  | 12.411 | -38.944 |
| ATOM | 68  | H | ??? | 1 | 7.043  | 11.659 | -37.929 |
| ATOM | 69  | C | ??? | 1 | 8.207  | 13.252 | -36.958 |
| ATOM | 70  | O | ??? | 1 | 8.476  | 14.390 | -37.363 |
| ATOM | 71  | N | ??? | 1 | 7.918  | 12.931 | -35.676 |
| ATOM | 72  | H | ??? | 1 | 7.746  | 11.945 | -35.440 |
| ATOM | 73  | C | ??? | 1 | 7.844  | 13.899 | -34.572 |
| ATOM | 74  | H | ??? | 1 | 6.991  | 14.578 | -34.787 |
| ATOM | 75  | C | ??? | 1 | 7.531  | 13.118 | -33.287 |
| ATOM | 76  | H | ??? | 1 | 8.319  | 12.357 | -33.112 |
| ATOM | 77  | H | ??? | 1 | 7.558  | 13.822 | -32.433 |
| ATOM | 78  | C | ??? | 1 | 6.160  | 12.415 | -33.322 |
| ATOM | 79  | H | ??? | 1 | 5.357  | 13.183 | -33.323 |
| ATOM | 80  | H | ??? | 1 | 6.040  | 11.819 | -34.248 |
| ATOM | 81  | C | ??? | 1 | 5.962  | 11.467 | -32.138 |
| ATOM | 82  | H | ??? | 1 | 6.654  | 10.605 | -32.224 |
| ATOM | 83  | H | ??? | 1 | 6.185  | 12.001 | -31.192 |
| ATOM | 84  | N | ??? | 1 | 4.572  | 10.999 | -32.103 |
| ATOM | 85  | H | ??? | 1 | 3.962  | 11.184 | -32.913 |
| ATOM | 86  | C | ??? | 1 | 3.990  | 10.365 | -31.078 |
| ATOM | 87  | N | ??? | 1 | 4.668  | 10.157 | -29.939 |
| ATOM | 88  | H | ??? | 1 | 5.617  | 10.525 | -29.828 |
| ATOM | 89  | H | ??? | 1 | 4.328  | 9.514  | -29.216 |
| ATOM | 90  | N | ??? | 1 | 2.710  | 9.939  | -31.207 |
| ATOM | 91  | H | ??? | 1 | 2.242  | 10.189 | -32.089 |
| ATOM | 92  | H | ??? | 1 | 2.100  | 9.949  | -30.387 |
| ATOM | 93  | H | ??? | 1 | 8.731  | 14.564 | -34.480 |
| ATOM | 94  | H | ??? | 1 | 8.402  | 7.472  | -28.174 |
| ATOM | 95  | C | ??? | 1 | 9.349  | 7.530  | -28.717 |
| ATOM | 96  | N | ??? | 1 | 9.553  | 6.787  | -29.864 |
| ATOM | 97  | C | ??? | 1 | 10.861 | 6.855  | -30.131 |
| ATOM | 98  | H | ??? | 1 | 11.373 | 6.366  | -30.960 |
| ATOM | 99  | N | ??? | 1 | 11.491 | 7.632  | -29.217 |
| ATOM | 100 | H | ??? | 1 | 12.501 | 7.858  | -29.230 |
| ATOM | 101 | C | ??? | 1 | 10.552 | 8.066  | -28.303 |
| ATOM | 102 | H | ??? | 1 | 10.820 | 8.743  | -27.492 |
| ATOM | 103 | O | ??? | 1 | 10.649 | 5.254  | -25.648 |
| ATOM | 104 | C | ??? | 1 | 10.943 | 4.629  | -26.731 |

|      |     |    |     |   |        |        |         |
|------|-----|----|-----|---|--------|--------|---------|
| ATOM | 105 | O  | ??? | 1 | 12.096 | 4.386  | -27.164 |
| ATOM | 106 | C  | ??? | 1 | 9.734  | 4.220  | -27.602 |
| ATOM | 107 | H  | ??? | 1 | 8.872  | 4.017  | -26.942 |
| ATOM | 108 | H  | ??? | 1 | 9.478  | 5.131  | -28.171 |
| ATOM | 109 | C  | ??? | 1 | 9.906  | 3.098  | -28.634 |
| ATOM | 110 | H  | ??? | 1 | 10.884 | 3.196  | -29.134 |
| ATOM | 111 | H  | ??? | 1 | 9.890  | 2.101  | -28.147 |
| ATOM | 112 | C  | ??? | 1 | 8.827  | 3.170  | -29.762 |
| ATOM | 113 | O  | ??? | 1 | 9.233  | 4.133  | -30.714 |
| ATOM | 114 | H  | ??? | 1 | 9.387  | 3.678  | -32.330 |
| ATOM | 115 | C  | ??? | 1 | 7.499  | 3.641  | -29.121 |
| ATOM | 116 | O  | ??? | 1 | 7.081  | 4.794  | -29.541 |
| ATOM | 117 | O  | ??? | 1 | 6.894  | 2.983  | -28.246 |
| ATOM | 118 | C  | ??? | 1 | 8.557  | 1.789  | -30.427 |
| ATOM | 119 | H  | ??? | 1 | 8.064  | 1.129  | -29.690 |
| ATOM | 120 | H  | ??? | 1 | 7.828  | 1.970  | -31.246 |
| ATOM | 121 | C  | ??? | 1 | 9.770  | 1.045  | -31.037 |
| ATOM | 122 | O  | ??? | 1 | 10.513 | 1.725  | -31.831 |
| ATOM | 123 | O  | ??? | 1 | 9.910  | -0.172 | -30.782 |
| ATOM | 124 | FE | ??? | 1 | 7.927  | 7.753  | -33.079 |
| ATOM | 125 | MO | ??? | 1 | 8.041  | 5.728  | -31.251 |
| ATOM | 126 | FE | ??? | 1 | 7.005  | 8.481  | -35.317 |
| ATOM | 127 | FE | ??? | 1 | 5.828  | 6.417  | -32.614 |
| ATOM | 128 | FE | ??? | 1 | 8.008  | 5.129  | -33.861 |
| ATOM | 129 | FE | ??? | 1 | 6.843  | 6.016  | -36.043 |
| ATOM | 130 | FE | ??? | 1 | 5.506  | 7.801  | -37.288 |
| ATOM | 131 | FE | ??? | 1 | 4.883  | 7.142  | -34.820 |
| ATOM | 132 | C  | ??? | 1 | 6.755  | 6.819  | -34.277 |
| ATOM | 133 | S  | ??? | 1 | 7.727  | 7.684  | -37.352 |
| ATOM | 134 | S  | ??? | 1 | 9.653  | 6.370  | -32.894 |
| ATOM | 135 | S  | ??? | 1 | 4.732  | 5.729  | -36.623 |
| ATOM | 136 | S  | ??? | 1 | 7.969  | 4.182  | -35.927 |
| ATOM | 137 | S  | ??? | 1 | 8.512  | 9.633  | -34.179 |
| ATOM | 138 | S  | ??? | 1 | 6.481  | 4.277  | -32.373 |
| ATOM | 139 | S  | ??? | 1 | 4.928  | 9.288  | -35.600 |
| ATOM | 140 | S  | ??? | 1 | 6.773  | 7.759  | -31.131 |
| ATOM | 141 | S  | ??? | 1 | 3.678  | 6.751  | -32.962 |
| ATOM | 142 | N  | ??? | 1 | 9.036  | 3.692  | -33.340 |
| ATOM | 143 | H  | ??? | 1 | 9.772  | 1.875  | -33.241 |
| ATOM | 144 | N  | ??? | 1 | 9.223  | 2.539  | -33.865 |
| ATOM | 145 | H  | ??? | 1 | 8.900  | 2.449  | -34.845 |
| ATOM | 146 | O  | ??? | 1 | 4.494  | 5.524  | -29.473 |
| ATOM | 147 | H  | ??? | 1 | 5.453  | 5.245  | -29.496 |
| ATOM | 148 | H  | ??? | 1 | 4.446  | 6.280  | -30.099 |
| ATOM | 149 | O  | ??? | 1 | 1.065  | 8.393  | -34.246 |
| ATOM | 150 | H  | ??? | 1 | 1.916  | 8.050  | -33.878 |
| ATOM | 151 | H  | ??? | 1 | 0.547  | 8.690  | -33.440 |
| END  |     |    |     |   |        |        |         |

Fe3/7Fe4/5

REMARK Energies (QM/MM, QM+ptch) = -17129.751918 -16290.127014

|      |    |   |     |   |        |        |         |
|------|----|---|-----|---|--------|--------|---------|
| ATOM | 1  | H | ??? | 1 | 3.501  | 2.238  | -29.687 |
| ATOM | 2  | C | ??? | 1 | 3.913  | 2.084  | -30.706 |
| ATOM | 3  | H | ??? | 1 | 5.006  | 2.241  | -30.656 |
| ATOM | 4  | H | ??? | 1 | 3.719  | 1.046  | -31.024 |
| ATOM | 5  | N | ??? | 1 | 3.363  | 2.998  | -31.696 |
| ATOM | 6  | H | ??? | 1 | 3.840  | 3.909  | -31.813 |
| ATOM | 7  | C | ??? | 1 | 2.668  | 2.579  | -32.771 |
| ATOM | 8  | N | ??? | 1 | 1.853  | 1.500  | -32.697 |
| ATOM | 9  | H | ??? | 1 | 1.706  | 1.011  | -31.810 |
| ATOM | 10 | H | ??? | 1 | 1.629  | 1.009  | -33.571 |
| ATOM | 11 | N | ??? | 1 | 2.795  | 3.222  | -33.928 |
| ATOM | 12 | H | ??? | 1 | 3.281  | 4.166  | -33.903 |
| ATOM | 13 | H | ??? | 1 | 2.096  | 3.087  | -34.665 |
| ATOM | 14 | H | ??? | 1 | 7.277  | 1.566  | -41.610 |
| ATOM | 15 | C | ??? | 1 | 7.583  | 2.040  | -40.669 |
| ATOM | 16 | N | ??? | 1 | 8.437  | 3.127  | -40.697 |
| ATOM | 17 | C | ??? | 1 | 8.514  | 3.543  | -39.439 |
| ATOM | 18 | H | ??? | 1 | 9.084  | 4.391  | -39.061 |
| ATOM | 19 | N | ??? | 1 | 7.754  | 2.775  | -38.612 |
| ATOM | 20 | H | ??? | 1 | 7.621  | 2.979  | -37.604 |
| ATOM | 21 | C | ??? | 1 | 7.136  | 1.812  | -39.380 |
| ATOM | 22 | H | ??? | 1 | 6.447  | 1.086  | -38.951 |
| ATOM | 23 | H | ??? | 1 | 2.984  | 9.554  | -40.118 |
| ATOM | 24 | C | ??? | 1 | 3.119  | 8.698  | -39.423 |
| ATOM | 25 | H | ??? | 1 | 2.477  | 7.858  | -39.738 |
| ATOM | 26 | H | ??? | 1 | 2.865  | 9.023  | -38.400 |
| ATOM | 27 | S | ??? | 1 | 4.912  | 8.190  | -39.469 |
| ATOM | 28 | H | ??? | 1 | 6.638  | 8.643  | -42.924 |
| ATOM | 29 | C | ??? | 1 | 7.437  | 7.843  | -42.960 |
| ATOM | 30 | H | ??? | 1 | 8.009  | 8.029  | -43.882 |
| ATOM | 31 | H | ??? | 1 | 8.093  | 7.981  | -42.082 |
| ATOM | 32 | C | ??? | 1 | 6.842  | 6.419  | -43.017 |
| ATOM | 33 | O | ??? | 1 | 7.270  | 5.643  | -43.883 |
| ATOM | 34 | N | ??? | 1 | 5.928  | 6.121  | -42.075 |
| ATOM | 35 | H | ??? | 1 | 5.590  | 6.842  | -41.418 |
| ATOM | 36 | C | ??? | 1 | 5.398  | 4.759  | -41.938 |
| ATOM | 37 | H | ??? | 1 | 6.255  | 4.091  | -42.143 |
| ATOM | 38 | C | ??? | 1 | 4.926  | 4.513  | -40.502 |
| ATOM | 39 | H | ??? | 1 | 4.628  | 3.453  | -40.424 |
| ATOM | 40 | H | ??? | 1 | 5.751  | 4.691  | -39.777 |
| ATOM | 41 | O | ??? | 1 | 3.784  | 5.293  | -40.131 |
| ATOM | 42 | H | ??? | 1 | 4.123  | 6.161  | -39.790 |
| ATOM | 43 | H | ??? | 1 | 4.612  | 4.493  | -42.662 |
| ATOM | 44 | H | ??? | 1 | 13.631 | 11.346 | -31.927 |
| ATOM | 45 | C | ??? | 1 | 12.722 | 10.655 | -31.975 |
| ATOM | 46 | H | ??? | 1 | 12.877 | 9.949  | -31.135 |
| ATOM | 47 | H | ??? | 1 | 11.738 | 11.191 | -31.790 |
| ATOM | 48 | C | ??? | 1 | 12.921 | 9.824  | -33.259 |
| ATOM | 49 | O | ??? | 1 | 14.067 | 9.636  | -33.675 |
| ATOM | 50 | N | ??? | 1 | 11.845 | 9.215  | -33.814 |
| ATOM | 51 | H | ??? | 1 | 10.870 | 9.418  | -33.540 |
| ATOM | 52 | C | ??? | 1 | 12.037 | 8.138  | -34.779 |
| ATOM | 53 | H | ??? | 1 | 13.007 | 7.669  | -34.567 |
| ATOM | 54 | H | ??? | 1 | 11.226 | 7.408  | -34.603 |

|      |     |    |     |   |        |        |         |
|------|-----|----|-----|---|--------|--------|---------|
| ATOM | 55  | C  | ??? | 1 | 12.048 | 8.515  | -36.274 |
| ATOM | 56  | O  | ??? | 1 | 13.046 | 8.345  | -36.981 |
| ATOM | 57  | N  | ??? | 1 | 10.851 | 8.975  | -36.749 |
| ATOM | 58  | H  | ??? | 1 | 10.039 | 8.917  | -36.098 |
| ATOM | 59  | C  | ??? | 1 | 10.615 | 9.147  | -38.167 |
| ATOM | 60  | H  | ??? | 1 | 11.593 | 9.268  | -38.666 |
| ATOM | 61  | H  | ??? | 1 | 10.130 | 8.251  | -38.598 |
| ATOM | 62  | C  | ??? | 1 | 9.703  | 10.299 | -38.587 |
| ATOM | 63  | O  | ??? | 1 | 9.582  | 10.563 | -39.791 |
| ATOM | 64  | N  | ??? | 1 | 9.050  | 10.975 | -37.603 |
| ATOM | 65  | H  | ??? | 1 | 9.046  | 10.581 | -36.649 |
| ATOM | 66  | C  | ??? | 1 | 8.106  | 12.041 | -37.923 |
| ATOM | 67  | H  | ??? | 1 | 8.346  | 12.394 | -38.936 |
| ATOM | 68  | H  | ??? | 1 | 7.046  | 11.652 | -37.927 |
| ATOM | 69  | C  | ??? | 1 | 8.206  | 13.228 | -36.950 |
| ATOM | 70  | O  | ??? | 1 | 8.439  | 14.374 | -37.359 |
| ATOM | 71  | N  | ??? | 1 | 7.927  | 12.912 | -35.663 |
| ATOM | 72  | H  | ??? | 1 | 7.868  | 11.919 | -35.391 |
| ATOM | 73  | C  | ??? | 1 | 7.854  | 13.912 | -34.591 |
| ATOM | 74  | H  | ??? | 1 | 7.010  | 14.592 | -34.834 |
| ATOM | 75  | C  | ??? | 1 | 7.538  | 13.196 | -33.275 |
| ATOM | 76  | H  | ??? | 1 | 8.301  | 12.415 | -33.078 |
| ATOM | 77  | H  | ??? | 1 | 7.595  | 13.934 | -32.452 |
| ATOM | 78  | C  | ??? | 1 | 6.151  | 12.538 | -33.268 |
| ATOM | 79  | H  | ??? | 1 | 5.373  | 13.308 | -33.447 |
| ATOM | 80  | H  | ??? | 1 | 6.067  | 11.801 | -34.093 |
| ATOM | 81  | C  | ??? | 1 | 5.866  | 11.835 | -31.942 |
| ATOM | 82  | H  | ??? | 1 | 6.629  | 11.054 | -31.746 |
| ATOM | 83  | H  | ??? | 1 | 5.935  | 12.557 | -31.103 |
| ATOM | 84  | N  | ??? | 1 | 4.533  | 11.221 | -31.988 |
| ATOM | 85  | H  | ??? | 1 | 3.896  | 11.462 | -32.765 |
| ATOM | 86  | C  | ??? | 1 | 4.009  | 10.423 | -31.040 |
| ATOM | 87  | N  | ??? | 1 | 4.704  | 10.149 | -29.932 |
| ATOM | 88  | H  | ??? | 1 | 5.606  | 10.606 | -29.761 |
| ATOM | 89  | H  | ??? | 1 | 4.415  | 9.420  | -29.268 |
| ATOM | 90  | N  | ??? | 1 | 2.792  | 9.876  | -31.266 |
| ATOM | 91  | H  | ??? | 1 | 2.280  | 10.194 | -32.103 |
| ATOM | 92  | H  | ??? | 1 | 2.213  | 9.589  | -30.476 |
| ATOM | 93  | H  | ??? | 1 | 8.736  | 14.572 | -34.492 |
| ATOM | 94  | H  | ??? | 1 | 8.405  | 7.460  | -28.187 |
| ATOM | 95  | C  | ??? | 1 | 9.347  | 7.498  | -28.754 |
| ATOM | 96  | N  | ??? | 1 | 9.531  | 6.765  | -29.918 |
| ATOM | 97  | C  | ??? | 1 | 10.829 | 6.856  | -30.218 |
| ATOM | 98  | H  | ??? | 1 | 11.317 | 6.401  | -31.081 |
| ATOM | 99  | N  | ??? | 1 | 11.478 | 7.623  | -29.306 |
| ATOM | 100 | H  | ??? | 1 | 12.487 | 7.855  | -29.331 |
| ATOM | 101 | C  | ??? | 1 | 10.557 | 8.036  | -28.364 |
| ATOM | 102 | H  | ??? | 1 | 10.843 | 8.701  | -27.549 |
| ATOM | 103 | O  | ??? | 1 | 10.658 | 5.252  | -25.646 |
| ATOM | 104 | C  | ??? | 1 | 10.938 | 4.622  | -26.727 |
| ATOM | 105 | O  | ??? | 1 | 12.084 | 4.349  | -27.163 |
| ATOM | 106 | C  | ??? | 1 | 9.721  | 4.245  | -27.601 |
| ATOM | 107 | H  | ??? | 1 | 8.837  | 4.112  | -26.952 |
| ATOM | 108 | H  | ??? | 1 | 9.525  | 5.140  | -28.216 |
| ATOM | 109 | C  | ??? | 1 | 9.855  | 3.074  | -28.578 |
| ATOM | 110 | H  | ??? | 1 | 10.842 | 3.119  | -29.069 |
| ATOM | 111 | H  | ??? | 1 | 9.808  | 2.102  | -28.045 |
| ATOM | 112 | C  | ??? | 1 | 8.775  | 3.140  | -29.703 |
| ATOM | 113 | O  | ??? | 1 | 9.218  | 4.034  | -30.715 |
| ATOM | 114 | H  | ??? | 1 | 9.962  | 3.095  | -31.499 |
| ATOM | 115 | C  | ??? | 1 | 7.458  | 3.639  | -29.093 |
| ATOM | 116 | O  | ??? | 1 | 7.057  | 4.771  | -29.544 |
| ATOM | 117 | O  | ??? | 1 | 6.858  | 2.978  | -28.212 |
| ATOM | 118 | C  | ??? | 1 | 8.487  | 1.771  | -30.376 |
| ATOM | 119 | H  | ??? | 1 | 8.114  | 1.029  | -29.650 |
| ATOM | 120 | H  | ??? | 1 | 7.697  | 1.948  | -31.136 |
| ATOM | 121 | C  | ??? | 1 | 9.706  | 1.215  | -31.095 |
| ATOM | 122 | O  | ??? | 1 | 10.405 | 2.135  | -31.760 |
| ATOM | 123 | O  | ??? | 1 | 10.000 | 0.021  | -31.072 |
| ATOM | 124 | FE | ??? | 1 | 6.873  | 8.455  | -35.278 |
| ATOM | 125 | MO | ??? | 1 | 8.004  | 5.668  | -31.307 |
| ATOM | 126 | FE | ??? | 1 | 4.835  | 7.079  | -34.805 |
| ATOM | 127 | FE | ??? | 1 | 5.741  | 6.445  | -32.630 |
| ATOM | 128 | FE | ??? | 1 | 7.772  | 7.800  | -33.086 |
| ATOM | 129 | FE | ??? | 1 | 5.425  | 7.634  | -37.351 |
| ATOM | 130 | FE | ??? | 1 | 6.858  | 5.978  | -36.086 |
| ATOM | 131 | FE | ??? | 1 | 7.751  | 5.252  | -33.849 |
| ATOM | 132 | C  | ??? | 1 | 6.691  | 6.748  | -34.351 |
| ATOM | 133 | S  | ??? | 1 | 7.685  | 7.715  | -37.286 |
| ATOM | 134 | S  | ??? | 1 | 9.530  | 6.313  | -33.029 |
| ATOM | 135 | S  | ??? | 1 | 4.715  | 5.631  | -36.581 |
| ATOM | 136 | S  | ??? | 1 | 8.010  | 4.138  | -35.694 |
| ATOM | 137 | S  | ??? | 1 | 8.701  | 9.512  | -34.394 |
| ATOM | 138 | S  | ??? | 1 | 6.397  | 4.256  | -32.386 |
| ATOM | 139 | S  | ??? | 1 | 4.665  | 9.088  | -35.905 |
| ATOM | 140 | S  | ??? | 1 | 6.786  | 7.623  | -31.082 |
| ATOM | 141 | S  | ??? | 1 | 3.570  | 6.055  | -33.150 |
| ATOM | 142 | N  | ??? | 1 | 5.110  | 8.178  | -33.215 |
| ATOM | 143 | H  | ??? | 1 | 4.319  | 8.673  | -32.785 |
| ATOM | 144 | N  | ??? | 1 | 6.248  | 8.946  | -33.472 |
| ATOM | 145 | H  | ??? | 1 | 6.166  | 9.928  | -33.198 |
| ATOM | 146 | O  | ??? | 1 | 4.471  | 5.580  | -29.439 |
| ATOM | 147 | H  | ??? | 1 | 5.411  | 5.268  | -29.521 |
| ATOM | 148 | H  | ??? | 1 | 4.280  | 5.996  | -30.311 |
| ATOM | 149 | O  | ??? | 1 | 1.133  | 8.365  | -34.201 |
| ATOM | 150 | H  | ??? | 1 | 1.908  | 7.846  | -33.863 |
| ATOM | 151 | H  | ??? | 1 | 0.611  | 8.636  | -33.391 |

END

Fe2(trans)

REMARK Energies (QM/MM, QM+ptch) = -17129.766955 -16290.137760

|      |   |   |     |   |       |       |         |
|------|---|---|-----|---|-------|-------|---------|
| ATOM | 1 | H | ??? | 1 | 3.501 | 2.241 | -29.687 |
| ATOM | 2 | C | ??? | 1 | 3.909 | 2.098 | -30.708 |
| ATOM | 3 | H | ??? | 1 | 5.013 | 2.109 | -30.637 |
| ATOM | 4 | H | ??? | 1 | 3.592 | 1.118 | -31.098 |

|      |     |   |     |   |        |        |         |
|------|-----|---|-----|---|--------|--------|---------|
| ATOM | 5   | N | ??? | 1 | 3.493  | 3.154  | -31.620 |
| ATOM | 6   | H | ??? | 1 | 3.981  | 4.057  | -31.516 |
| ATOM | 7   | C | ??? | 1 | 2.859  | 2.939  | -32.785 |
| ATOM | 8   | N | ??? | 1 | 1.997  | 1.896  | -32.913 |
| ATOM | 9   | H | ??? | 1 | 1.821  | 1.286  | -32.112 |
| ATOM | 10  | H | ??? | 1 | 1.794  | 1.510  | -33.846 |
| ATOM | 11  | N | ??? | 1 | 3.077  | 3.759  | -33.815 |
| ATOM | 12  | H | ??? | 1 | 3.633  | 4.630  | -33.661 |
| ATOM | 13  | H | ??? | 1 | 2.419  | 3.793  | -34.600 |
| ATOM | 14  | H | ??? | 1 | 7.285  | 1.552  | -41.606 |
| ATOM | 15  | C | ??? | 1 | 7.615  | 1.993  | -40.657 |
| ATOM | 16  | N | ??? | 1 | 8.576  | 2.984  | -40.667 |
| ATOM | 17  | C | ??? | 1 | 8.816  | 3.256  | -39.393 |
| ATOM | 18  | H | ??? | 1 | 9.514  | 3.996  | -39.003 |
| ATOM | 19  | N | ??? | 1 | 8.045  | 2.494  | -38.564 |
| ATOM | 20  | H | ??? | 1 | 7.996  | 2.635  | -37.537 |
| ATOM | 21  | C | ??? | 1 | 7.254  | 1.685  | -39.358 |
| ATOM | 22  | H | ??? | 1 | 6.524  | 0.996  | -38.934 |
| ATOM | 23  | H | ??? | 1 | 2.986  | 9.555  | -40.114 |
| ATOM | 24  | C | ??? | 1 | 3.127  | 8.704  | -39.412 |
| ATOM | 25  | H | ??? | 1 | 2.585  | 7.812  | -39.772 |
| ATOM | 26  | H | ??? | 1 | 2.759  | 9.010  | -38.419 |
| ATOM | 27  | S | ??? | 1 | 4.964  | 8.376  | -39.335 |
| ATOM | 28  | H | ??? | 1 | 6.631  | 8.637  | -42.917 |
| ATOM | 29  | C | ??? | 1 | 7.422  | 7.828  | -42.944 |
| ATOM | 30  | H | ??? | 1 | 7.988  | 7.991  | -43.874 |
| ATOM | 31  | H | ??? | 1 | 8.088  | 7.976  | -42.076 |
| ATOM | 32  | C | ??? | 1 | 6.816  | 6.407  | -42.980 |
| ATOM | 33  | O | ??? | 1 | 7.231  | 5.626  | -43.847 |
| ATOM | 34  | N | ??? | 1 | 5.901  | 6.112  | -42.035 |
| ATOM | 35  | H | ??? | 1 | 5.611  | 6.816  | -41.342 |
| ATOM | 36  | C | ??? | 1 | 5.368  | 4.750  | -41.923 |
| ATOM | 37  | H | ??? | 1 | 6.224  | 4.078  | -42.113 |
| ATOM | 38  | C | ??? | 1 | 4.828  | 4.450  | -40.520 |
| ATOM | 39  | H | ??? | 1 | 4.349  | 3.455  | -40.561 |
| ATOM | 40  | H | ??? | 1 | 5.647  | 4.398  | -39.784 |
| ATOM | 41  | O | ??? | 1 | 3.819  | 5.366  | -40.069 |
| ATOM | 42  | H | ??? | 1 | 4.267  | 6.157  | -39.671 |
| ATOM | 43  | H | ??? | 1 | 4.600  | 4.490  | -42.659 |
| ATOM | 44  | H | ??? | 1 | 13.633 | 11.343 | -31.926 |
| ATOM | 45  | C | ??? | 1 | 12.721 | 10.656 | -31.968 |
| ATOM | 46  | H | ??? | 1 | 12.875 | 9.952  | -31.126 |
| ATOM | 47  | H | ??? | 1 | 11.737 | 11.192 | -31.787 |
| ATOM | 48  | C | ??? | 1 | 12.895 | 9.816  | -33.248 |
| ATOM | 49  | O | ??? | 1 | 14.026 | 9.621  | -33.697 |
| ATOM | 50  | N | ??? | 1 | 11.798 | 9.207  | -33.762 |
| ATOM | 51  | H | ??? | 1 | 10.837 | 9.426  | -33.455 |
| ATOM | 52  | C | ??? | 1 | 11.952 | 8.124  | -34.724 |
| ATOM | 53  | H | ??? | 1 | 12.903 | 7.615  | -34.518 |
| ATOM | 54  | H | ??? | 1 | 11.115 | 7.424  | -34.553 |
| ATOM | 55  | C | ??? | 1 | 11.980 | 8.530  | -36.206 |
| ATOM | 56  | O | ??? | 1 | 12.991 | 8.409  | -36.902 |
| ATOM | 57  | N | ??? | 1 | 10.780 | 8.988  | -36.696 |
| ATOM | 58  | H | ??? | 1 | 9.936  | 8.822  | -36.122 |
| ATOM | 59  | C | ??? | 1 | 10.593 | 9.161  | -38.125 |
| ATOM | 60  | H | ??? | 1 | 11.590 | 9.301  | -38.578 |
| ATOM | 61  | H | ??? | 1 | 10.148 | 8.258  | -38.580 |
| ATOM | 62  | C | ??? | 1 | 9.677  | 10.296 | -38.573 |
| ATOM | 63  | O | ??? | 1 | 9.517  | 10.495 | -39.783 |
| ATOM | 64  | N | ??? | 1 | 9.073  | 11.034 | -37.604 |
| ATOM | 65  | H | ??? | 1 | 9.139  | 10.708 | -36.634 |
| ATOM | 66  | C | ??? | 1 | 8.103  | 12.072 | -37.930 |
| ATOM | 67  | H | ??? | 1 | 8.330  | 12.426 | -38.946 |
| ATOM | 68  | H | ??? | 1 | 7.045  | 11.663 | -37.930 |
| ATOM | 69  | C | ??? | 1 | 8.205  | 13.260 | -36.958 |
| ATOM | 70  | O | ??? | 1 | 8.478  | 14.400 | -37.359 |
| ATOM | 71  | N | ??? | 1 | 7.915  | 12.937 | -35.677 |
| ATOM | 72  | H | ??? | 1 | 7.727  | 11.953 | -35.447 |
| ATOM | 73  | C | ??? | 1 | 7.844  | 13.903 | -34.571 |
| ATOM | 74  | H | ??? | 1 | 6.992  | 14.584 | -34.786 |
| ATOM | 75  | C | ??? | 1 | 7.533  | 13.125 | -33.285 |
| ATOM | 76  | H | ??? | 1 | 8.316  | 12.358 | -33.112 |
| ATOM | 77  | H | ??? | 1 | 7.570  | 13.831 | -32.432 |
| ATOM | 78  | C | ??? | 1 | 6.158  | 12.434 | -33.312 |
| ATOM | 79  | H | ??? | 1 | 5.359  | 13.205 | -33.308 |
| ATOM | 80  | H | ??? | 1 | 6.027  | 11.840 | -34.239 |
| ATOM | 81  | C | ??? | 1 | 5.960  | 11.482 | -32.131 |
| ATOM | 82  | H | ??? | 1 | 6.650  | 10.619 | -32.224 |
| ATOM | 83  | H | ??? | 1 | 6.188  | 12.011 | -31.183 |
| ATOM | 84  | N | ??? | 1 | 4.568  | 11.023 | -32.096 |
| ATOM | 85  | H | ??? | 1 | 3.964  | 11.194 | -32.914 |
| ATOM | 86  | C | ??? | 1 | 3.995  | 10.360 | -31.085 |
| ATOM | 87  | N | ??? | 1 | 4.680  | 10.130 | -29.954 |
| ATOM | 88  | H | ??? | 1 | 5.623  | 10.512 | -29.837 |
| ATOM | 89  | H | ??? | 1 | 4.343  | 9.480  | -29.237 |
| ATOM | 90  | N | ??? | 1 | 2.718  | 9.929  | -31.221 |
| ATOM | 91  | H | ??? | 1 | 2.247  | 10.194 | -32.097 |
| ATOM | 92  | H | ??? | 1 | 2.110  | 9.911  | -30.399 |
| ATOM | 93  | H | ??? | 1 | 8.731  | 14.566 | -34.480 |
| ATOM | 94  | H | ??? | 1 | 8.407  | 7.459  | -28.187 |
| ATOM | 95  | C | ??? | 1 | 9.352  | 7.497  | -28.749 |
| ATOM | 96  | N | ??? | 1 | 9.563  | 6.751  | -29.900 |
| ATOM | 97  | C | ??? | 1 | 10.864 | 6.856  | -30.184 |
| ATOM | 98  | H | ??? | 1 | 11.370 | 6.393  | -31.034 |
| ATOM | 99  | N | ??? | 1 | 11.489 | 7.644  | -29.276 |
| ATOM | 100 | H | ??? | 1 | 12.496 | 7.886  | -29.293 |
| ATOM | 101 | C | ??? | 1 | 10.551 | 8.056  | -28.350 |
| ATOM | 102 | H | ??? | 1 | 10.816 | 8.735  | -27.541 |
| ATOM | 103 | O | ??? | 1 | 10.667 | 5.255  | -25.629 |
| ATOM | 104 | C | ??? | 1 | 10.946 | 4.622  | -26.709 |
| ATOM | 105 | O | ??? | 1 | 12.091 | 4.350  | -27.148 |
| ATOM | 106 | C | ??? | 1 | 9.730  | 4.240  | -27.578 |
| ATOM | 107 | H | ??? | 1 | 8.839  | 4.135  | -26.933 |
| ATOM | 108 | H | ??? | 1 | 9.550  | 5.120  | -28.219 |
| ATOM | 109 | C | ??? | 1 | 9.858  | 3.043  | -28.521 |

|      |     |    |     |   |        |        |         |
|------|-----|----|-----|---|--------|--------|---------|
| ATOM | 110 | H  | ??? | 1 | 10.850 | 3.065  | -29.003 |
| ATOM | 111 | H  | ??? | 1 | 9.794  | 2.084  | -27.967 |
| ATOM | 112 | C  | ??? | 1 | 8.797  | 3.110  | -29.661 |
| ATOM | 113 | O  | ??? | 1 | 9.282  | 3.993  | -30.662 |
| ATOM | 114 | H  | ??? | 1 | 9.994  | 3.075  | -31.428 |
| ATOM | 115 | C  | ??? | 1 | 7.474  | 3.631  | -29.083 |
| ATOM | 116 | O  | ??? | 1 | 7.090  | 4.765  | -29.550 |
| ATOM | 117 | O  | ??? | 1 | 6.851  | 2.980  | -28.212 |
| ATOM | 118 | C  | ??? | 1 | 8.508  | 1.742  | -30.334 |
| ATOM | 119 | H  | ??? | 1 | 8.133  | 0.999  | -29.610 |
| ATOM | 120 | H  | ??? | 1 | 7.718  | 1.918  | -31.094 |
| ATOM | 121 | C  | ??? | 1 | 9.723  | 1.183  | -31.060 |
| ATOM | 122 | O  | ??? | 1 | 10.430 | 2.097  | -31.715 |
| ATOM | 123 | O  | ??? | 1 | 9.996  | -0.018 | -31.050 |
| ATOM | 124 | FE | ??? | 1 | 5.903  | 6.325  | -32.619 |
| ATOM | 125 | MO | ??? | 1 | 8.089  | 5.629  | -31.308 |
| ATOM | 126 | FE | ??? | 1 | 7.776  | 5.238  | -33.917 |
| ATOM | 127 | FE | ??? | 1 | 8.063  | 7.635  | -33.073 |
| ATOM | 128 | FE | ??? | 1 | 4.840  | 7.240  | -34.680 |
| ATOM | 129 | FE | ??? | 1 | 6.961  | 6.111  | -36.197 |
| ATOM | 130 | FE | ??? | 1 | 5.342  | 7.983  | -37.095 |
| ATOM | 131 | FE | ??? | 1 | 6.908  | 8.644  | -35.101 |
| ATOM | 132 | C  | ??? | 1 | 6.735  | 6.872  | -34.305 |
| ATOM | 133 | S  | ??? | 1 | 7.691  | 8.082  | -37.135 |
| ATOM | 134 | S  | ??? | 1 | 9.691  | 6.035  | -33.009 |
| ATOM | 135 | S  | ??? | 1 | 4.643  | 5.933  | -36.503 |
| ATOM | 136 | S  | ??? | 1 | 7.985  | 4.117  | -35.753 |
| ATOM | 137 | S  | ??? | 1 | 8.565  | 9.626  | -33.964 |
| ATOM | 138 | S  | ??? | 1 | 6.531  | 4.164  | -32.410 |
| ATOM | 139 | S  | ??? | 1 | 4.736  | 9.376  | -35.350 |
| ATOM | 140 | S  | ??? | 1 | 6.880  | 7.674  | -31.154 |
| ATOM | 141 | S  | ??? | 1 | 3.726  | 6.688  | -32.828 |
| ATOM | 142 | N  | ??? | 1 | 7.052  | 5.449  | -38.020 |
| ATOM | 143 | H  | ??? | 1 | 6.788  | 4.449  | -38.087 |
| ATOM | 144 | N  | ??? | 1 | 7.303  | 5.918  | -39.158 |
| ATOM | 145 | H  | ??? | 1 | 7.537  | 6.931  | -39.000 |
| ATOM | 146 | O  | ??? | 1 | 4.494  | 5.525  | -29.479 |
| ATOM | 147 | H  | ??? | 1 | 5.452  | 5.259  | -29.529 |
| ATOM | 148 | H  | ??? | 1 | 4.390  | 6.209  | -30.180 |
| ATOM | 149 | O  | ??? | 1 | 1.094  | 8.389  | -34.237 |
| ATOM | 150 | H  | ??? | 1 | 1.964  | 8.083  | -33.880 |
| ATOM | 151 | H  | ??? | 1 | 0.579  | 8.681  | -33.428 |
| END  |     |    |     |   |        |        |         |

FE6(Trans)

REMARK Energies (QM/MM, QM+ptch) = -17129.761127 -16290.136624

|      |    |   |     |   |        |        |         |
|------|----|---|-----|---|--------|--------|---------|
| ATOM | 1  | H | ??? | 1 | 3.499  | 2.241  | -29.688 |
| ATOM | 2  | C | ??? | 1 | 3.903  | 2.099  | -30.709 |
| ATOM | 3  | H | ??? | 1 | 5.008  | 2.105  | -30.645 |
| ATOM | 4  | H | ??? | 1 | 3.578  | 1.122  | -31.102 |
| ATOM | 5  | N | ??? | 1 | 3.485  | 3.163  | -31.611 |
| ATOM | 6  | H | ??? | 1 | 3.977  | 4.063  | -31.495 |
| ATOM | 7  | C | ??? | 1 | 2.865  | 2.960  | -32.787 |
| ATOM | 8  | N | ??? | 1 | 2.006  | 1.917  | -32.933 |
| ATOM | 9  | H | ??? | 1 | 1.823  | 1.301  | -32.140 |
| ATOM | 10 | H | ??? | 1 | 1.806  | 1.541  | -33.871 |
| ATOM | 11 | N | ??? | 1 | 3.092  | 3.792  | -33.805 |
| ATOM | 12 | H | ??? | 1 | 3.650  | 4.660  | -33.644 |
| ATOM | 13 | H | ??? | 1 | 2.447  | 3.830  | -34.600 |
| ATOM | 14 | H | ??? | 1 | 7.277  | 1.561  | -41.617 |
| ATOM | 15 | C | ??? | 1 | 7.587  | 2.025  | -40.682 |
| ATOM | 16 | N | ??? | 1 | 8.442  | 3.111  | -40.695 |
| ATOM | 17 | C | ??? | 1 | 8.530  | 3.498  | -39.428 |
| ATOM | 18 | H | ??? | 1 | 9.095  | 4.344  | -39.036 |
| ATOM | 19 | N | ??? | 1 | 7.780  | 2.707  | -38.614 |
| ATOM | 20 | H | ??? | 1 | 7.625  | 2.910  | -37.609 |
| ATOM | 21 | C | ??? | 1 | 7.151  | 1.766  | -39.396 |
| ATOM | 22 | H | ??? | 1 | 6.462  | 1.033  | -38.979 |
| ATOM | 23 | H | ??? | 1 | 2.981  | 9.557  | -40.119 |
| ATOM | 24 | C | ??? | 1 | 3.113  | 8.706  | -39.423 |
| ATOM | 25 | H | ??? | 1 | 2.536  | 7.832  | -39.770 |
| ATOM | 26 | H | ??? | 1 | 2.781  | 9.021  | -38.420 |
| ATOM | 27 | S | ??? | 1 | 4.940  | 8.334  | -39.404 |
| ATOM | 28 | H | ??? | 1 | 6.637  | 8.643  | -42.923 |
| ATOM | 29 | C | ??? | 1 | 7.435  | 7.841  | -42.957 |
| ATOM | 30 | H | ??? | 1 | 8.006  | 8.021  | -43.881 |
| ATOM | 31 | H | ??? | 1 | 8.092  | 7.980  | -42.081 |
| ATOM | 32 | C | ??? | 1 | 6.836  | 6.419  | -43.008 |
| ATOM | 33 | O | ??? | 1 | 7.257  | 5.639  | -43.871 |
| ATOM | 34 | N | ??? | 1 | 5.922  | 6.126  | -42.062 |
| ATOM | 35 | H | ??? | 1 | 5.600  | 6.846  | -41.399 |
| ATOM | 36 | C | ??? | 1 | 5.389  | 4.765  | -41.923 |
| ATOM | 37 | H | ??? | 1 | 6.245  | 4.095  | -42.125 |
| ATOM | 38 | C | ??? | 1 | 4.928  | 4.527  | -40.482 |
| ATOM | 39 | H | ??? | 1 | 4.589  | 3.478  | -40.408 |
| ATOM | 40 | H | ??? | 1 | 5.771  | 4.664  | -39.771 |
| ATOM | 41 | O | ??? | 1 | 3.823  | 5.350  | -40.081 |
| ATOM | 42 | H | ??? | 1 | 4.198  | 6.188  | -39.704 |
| ATOM | 43 | H | ??? | 1 | 4.606  | 4.495  | -42.653 |
| ATOM | 44 | H | ??? | 1 | 13.632 | 11.344 | -31.927 |
| ATOM | 45 | C | ??? | 1 | 12.720 | 10.656 | -31.971 |
| ATOM | 46 | H | ??? | 1 | 12.875 | 9.950  | -31.130 |
| ATOM | 47 | H | ??? | 1 | 11.737 | 11.192 | -31.788 |
| ATOM | 48 | C | ??? | 1 | 12.897 | 9.820  | -33.253 |
| ATOM | 49 | O | ??? | 1 | 14.033 | 9.620  | -33.691 |
| ATOM | 50 | N | ??? | 1 | 11.804 | 9.216  | -33.782 |
| ATOM | 51 | H | ??? | 1 | 10.839 | 9.444  | -33.495 |
| ATOM | 52 | C | ??? | 1 | 11.969 | 8.134  | -34.743 |
| ATOM | 53 | H | ??? | 1 | 12.930 | 7.644  | -34.540 |
| ATOM | 54 | H | ??? | 1 | 11.146 | 7.419  | -34.565 |
| ATOM | 55 | C | ??? | 1 | 11.982 | 8.527  | -36.230 |
| ATOM | 56 | O | ??? | 1 | 12.991 | 8.405  | -36.929 |
| ATOM | 57 | N | ??? | 1 | 10.775 | 8.964  | -36.716 |
| ATOM | 58 | H | ??? | 1 | 9.940  | 8.823  | -36.121 |
| ATOM | 59 | C | ??? | 1 | 10.577 | 9.143  | -38.142 |

|      |     |    |     |   |        |        |         |
|------|-----|----|-----|---|--------|--------|---------|
| ATOM | 60  | H  | ??? | 1 | 11.571 | 9.266  | -38.606 |
| ATOM | 61  | H  | ??? | 1 | 10.106 | 8.249  | -38.589 |
| ATOM | 62  | C  | ??? | 1 | 9.677  | 10.294 | -38.578 |
| ATOM | 63  | O  | ??? | 1 | 9.539  | 10.524 | -39.786 |
| ATOM | 64  | N  | ??? | 1 | 9.052  | 11.005 | -37.602 |
| ATOM | 65  | H  | ??? | 1 | 9.103  | 10.664 | -36.634 |
| ATOM | 66  | C  | ??? | 1 | 8.100  | 12.061 | -37.927 |
| ATOM | 67  | H  | ??? | 1 | 8.335  | 12.411 | -38.943 |
| ATOM | 68  | H  | ??? | 1 | 7.043  | 11.659 | -37.929 |
| ATOM | 69  | C  | ??? | 1 | 8.206  | 13.251 | -36.956 |
| ATOM | 70  | O  | ??? | 1 | 8.472  | 14.391 | -37.363 |
| ATOM | 71  | N  | ??? | 1 | 7.918  | 12.931 | -35.675 |
| ATOM | 72  | H  | ??? | 1 | 7.757  | 11.943 | -35.437 |
| ATOM | 73  | C  | ??? | 1 | 7.845  | 13.897 | -34.570 |
| ATOM | 74  | H  | ??? | 1 | 6.991  | 14.577 | -34.785 |
| ATOM | 75  | C  | ??? | 1 | 7.534  | 13.113 | -33.287 |
| ATOM | 76  | H  | ??? | 1 | 8.317  | 12.344 | -33.123 |
| ATOM | 77  | H  | ??? | 1 | 7.572  | 13.810 | -32.428 |
| ATOM | 78  | C  | ??? | 1 | 6.156  | 12.422 | -33.319 |
| ATOM | 79  | H  | ??? | 1 | 5.359  | 13.194 | -33.274 |
| ATOM | 80  | H  | ??? | 1 | 6.013  | 11.865 | -34.267 |
| ATOM | 81  | C  | ??? | 1 | 5.974  | 11.427 | -32.172 |
| ATOM | 82  | H  | ??? | 1 | 6.647  | 10.558 | -32.316 |
| ATOM | 83  | H  | ??? | 1 | 6.234  | 11.915 | -31.211 |
| ATOM | 84  | N  | ??? | 1 | 4.575  | 10.988 | -32.115 |
| ATOM | 85  | H  | ??? | 1 | 3.967  | 11.161 | -32.929 |
| ATOM | 86  | C  | ??? | 1 | 3.994  | 10.359 | -31.087 |
| ATOM | 87  | N  | ??? | 1 | 4.675  | 10.142 | -29.951 |
| ATOM | 88  | H  | ??? | 1 | 5.628  | 10.500 | -29.846 |
| ATOM | 89  | H  | ??? | 1 | 4.333  | 9.500  | -29.229 |
| ATOM | 90  | N  | ??? | 1 | 2.708  | 9.946  | -31.209 |
| ATOM | 91  | H  | ??? | 1 | 2.239  | 10.200 | -32.089 |
| ATOM | 92  | H  | ??? | 1 | 2.103  | 9.961  | -30.385 |
| ATOM | 93  | H  | ??? | 1 | 8.732  | 14.564 | -34.479 |
| ATOM | 94  | H  | ??? | 1 | 8.405  | 7.467  | -28.180 |
| ATOM | 95  | C  | ??? | 1 | 9.351  | 7.518  | -28.733 |
| ATOM | 96  | N  | ??? | 1 | 9.554  | 6.785  | -29.891 |
| ATOM | 97  | C  | ??? | 1 | 10.856 | 6.881  | -30.175 |
| ATOM | 98  | H  | ??? | 1 | 11.361 | 6.422  | -31.027 |
| ATOM | 99  | N  | ??? | 1 | 11.487 | 7.656  | -29.260 |
| ATOM | 100 | H  | ??? | 1 | 12.495 | 7.893  | -29.277 |
| ATOM | 101 | C  | ??? | 1 | 10.552 | 8.067  | -28.330 |
| ATOM | 102 | H  | ??? | 1 | 10.821 | 8.741  | -27.517 |
| ATOM | 103 | O  | ??? | 1 | 10.670 | 5.260  | -25.619 |
| ATOM | 104 | C  | ??? | 1 | 10.935 | 4.638  | -26.708 |
| ATOM | 105 | O  | ??? | 1 | 12.074 | 4.358  | -27.158 |
| ATOM | 106 | C  | ??? | 1 | 9.709  | 4.278  | -27.573 |
| ATOM | 107 | H  | ??? | 1 | 8.816  | 4.192  | -26.929 |
| ATOM | 108 | H  | ??? | 1 | 9.548  | 5.157  | -28.221 |
| ATOM | 109 | C  | ??? | 1 | 9.826  | 3.078  | -28.510 |
| ATOM | 110 | H  | ??? | 1 | 10.826 | 3.088  | -28.974 |
| ATOM | 111 | H  | ??? | 1 | 9.747  | 2.122  | -27.952 |
| ATOM | 112 | C  | ??? | 1 | 8.774  | 3.144  | -29.660 |
| ATOM | 113 | O  | ??? | 1 | 9.264  | 4.034  | -30.657 |
| ATOM | 114 | H  | ??? | 1 | 10.235 | 3.019  | -31.189 |
| ATOM | 115 | C  | ??? | 1 | 7.448  | 3.653  | -29.082 |
| ATOM | 116 | O  | ??? | 1 | 7.064  | 4.794  | -29.525 |
| ATOM | 117 | O  | ??? | 1 | 6.831  | 2.984  | -28.218 |
| ATOM | 118 | C  | ??? | 1 | 8.513  | 1.768  | -30.329 |
| ATOM | 119 | H  | ??? | 1 | 8.061  | 1.047  | -29.626 |
| ATOM | 120 | H  | ??? | 1 | 7.789  | 1.936  | -31.155 |
| ATOM | 121 | C  | ??? | 1 | 9.774  | 1.164  | -30.927 |
| ATOM | 122 | O  | ??? | 1 | 10.640 | 2.062  | -31.407 |
| ATOM | 123 | O  | ??? | 1 | 9.976  | -0.045 | -30.974 |
| ATOM | 124 | FE | ??? | 1 | 8.005  | 7.716  | -33.087 |
| ATOM | 125 | MO | ??? | 1 | 8.042  | 5.732  | -31.271 |
| ATOM | 126 | FE | ??? | 1 | 7.865  | 5.182  | -33.898 |
| ATOM | 127 | FE | ??? | 1 | 5.841  | 6.440  | -32.595 |
| ATOM | 128 | FE | ??? | 1 | 6.989  | 8.580  | -35.311 |
| ATOM | 129 | FE | ??? | 1 | 5.349  | 7.891  | -37.200 |
| ATOM | 130 | FE | ??? | 1 | 6.799  | 6.177  | -36.013 |
| ATOM | 131 | FE | ??? | 1 | 4.855  | 7.242  | -34.774 |
| ATOM | 132 | C  | ??? | 1 | 6.732  | 6.901  | -34.288 |
| ATOM | 133 | S  | ??? | 1 | 7.668  | 7.717  | -37.354 |
| ATOM | 134 | S  | ??? | 1 | 9.649  | 6.221  | -32.968 |
| ATOM | 135 | S  | ??? | 1 | 4.660  | 5.844  | -36.530 |
| ATOM | 136 | S  | ??? | 1 | 7.782  | 4.302  | -35.969 |
| ATOM | 137 | S  | ??? | 1 | 8.574  | 9.635  | -34.157 |
| ATOM | 138 | S  | ??? | 1 | 6.433  | 4.298  | -32.345 |
| ATOM | 139 | S  | ??? | 1 | 4.812  | 9.352  | -35.490 |
| ATOM | 140 | S  | ??? | 1 | 6.853  | 7.788  | -31.156 |
| ATOM | 141 | S  | ??? | 1 | 3.694  | 6.777  | -32.919 |
| ATOM | 142 | N  | ??? | 1 | 8.845  | 3.602  | -33.464 |
| ATOM | 143 | H  | ??? | 1 | 9.064  | 3.581  | -32.446 |
| ATOM | 144 | N  | ??? | 1 | 9.268  | 2.581  | -34.041 |
| ATOM | 145 | H  | ??? | 1 | 8.992  | 2.684  | -35.050 |
| ATOM | 146 | O  | ??? | 1 | 4.469  | 5.542  | -29.477 |
| ATOM | 147 | H  | ??? | 1 | 5.427  | 5.271  | -29.513 |
| ATOM | 148 | H  | ??? | 1 | 4.385  | 6.232  | -30.173 |
| ATOM | 149 | O  | ??? | 1 | 1.066  | 8.390  | -34.247 |
| ATOM | 150 | H  | ??? | 1 | 1.928  | 8.067  | -33.885 |
| ATOM | 151 | H  | ??? | 1 | 0.553  | 8.689  | -33.439 |

END

Fe4(trans)

REMARK Energies (QM/MM, QM+ptch) = -17129.756264 -16290.132084

|      |   |   |     |   |       |       |         |
|------|---|---|-----|---|-------|-------|---------|
| ATOM | 1 | H | ??? | 1 | 3.504 | 2.237 | -29.684 |
| ATOM | 2 | C | ??? | 1 | 3.922 | 2.083 | -30.700 |
| ATOM | 3 | H | ??? | 1 | 5.021 | 2.188 | -30.635 |
| ATOM | 4 | H | ??? | 1 | 3.686 | 1.062 | -31.042 |
| ATOM | 5 | N | ??? | 1 | 3.430 | 3.045 | -31.674 |
| ATOM | 6 | H | ??? | 1 | 3.941 | 3.941 | -31.738 |
| ATOM | 7 | C | ??? | 1 | 2.731 | 2.691 | -32.767 |
| ATOM | 8 | N | ??? | 1 | 1.886 | 1.630 | -32.741 |
| ATOM | 9 | H | ??? | 1 | 1.741 | 1.101 | -31.878 |

|      |     |   |     |   |        |        |         |
|------|-----|---|-----|---|--------|--------|---------|
| ATOM | 10  | H | ??? | 1 | 1.664  | 1.166  | -33.633 |
| ATOM | 11  | N | ??? | 1 | 2.876  | 3.384  | -33.894 |
| ATOM | 12  | H | ??? | 1 | 3.406  | 4.290  | -33.862 |
| ATOM | 13  | H | ??? | 1 | 2.181  | 3.302  | -34.642 |
| ATOM | 14  | H | ??? | 1 | 7.276  | 1.565  | -41.613 |
| ATOM | 15  | C | ??? | 1 | 7.581  | 2.036  | -40.674 |
| ATOM | 16  | N | ??? | 1 | 8.438  | 3.120  | -40.694 |
| ATOM | 17  | C | ??? | 1 | 8.515  | 3.525  | -39.432 |
| ATOM | 18  | H | ??? | 1 | 9.092  | 4.365  | -39.046 |
| ATOM | 19  | N | ??? | 1 | 7.749  | 2.755  | -38.613 |
| ATOM | 20  | H | ??? | 1 | 7.625  | 2.940  | -37.601 |
| ATOM | 21  | C | ??? | 1 | 7.131  | 1.800  | -39.388 |
| ATOM | 22  | H | ??? | 1 | 6.438  | 1.073  | -38.965 |
| ATOM | 23  | H | ??? | 1 | 2.997  | 9.552  | -40.121 |
| ATOM | 24  | C | ??? | 1 | 3.159  | 8.694  | -39.433 |
| ATOM | 25  | H | ??? | 1 | 2.528  | 7.841  | -39.737 |
| ATOM | 26  | H | ??? | 1 | 2.939  | 9.004  | -38.398 |
| ATOM | 27  | S | ??? | 1 | 4.969  | 8.250  | -39.578 |
| ATOM | 28  | H | ??? | 1 | 6.639  | 8.644  | -42.926 |
| ATOM | 29  | C | ??? | 1 | 7.440  | 7.845  | -42.963 |
| ATOM | 30  | H | ??? | 1 | 8.014  | 8.035  | -43.883 |
| ATOM | 31  | H | ??? | 1 | 8.094  | 7.981  | -42.083 |
| ATOM | 32  | C | ??? | 1 | 6.849  | 6.419  | -43.027 |
| ATOM | 33  | O | ??? | 1 | 7.283  | 5.645  | -43.891 |
| ATOM | 34  | N | ??? | 1 | 5.934  | 6.118  | -42.087 |
| ATOM | 35  | H | ??? | 1 | 5.581  | 6.845  | -41.443 |
| ATOM | 36  | C | ??? | 1 | 5.404  | 4.757  | -41.951 |
| ATOM | 37  | H | ??? | 1 | 6.259  | 4.088  | -42.154 |
| ATOM | 38  | C | ??? | 1 | 4.924  | 4.512  | -40.519 |
| ATOM | 39  | H | ??? | 1 | 4.616  | 3.454  | -40.442 |
| ATOM | 40  | H | ??? | 1 | 5.743  | 4.681  | -39.786 |
| ATOM | 41  | O | ??? | 1 | 3.784  | 5.302  | -40.155 |
| ATOM | 42  | H | ??? | 1 | 4.132  | 6.166  | -39.819 |
| ATOM | 43  | H | ??? | 1 | 4.615  | 4.493  | -42.669 |
| ATOM | 44  | H | ??? | 1 | 13.631 | 11.343 | -31.927 |
| ATOM | 45  | C | ??? | 1 | 12.720 | 10.654 | -31.972 |
| ATOM | 46  | H | ??? | 1 | 12.875 | 9.949  | -31.131 |
| ATOM | 47  | H | ??? | 1 | 11.737 | 11.192 | -31.789 |
| ATOM | 48  | C | ??? | 1 | 12.898 | 9.820  | -33.255 |
| ATOM | 49  | O | ??? | 1 | 14.033 | 9.627  | -33.695 |
| ATOM | 50  | N | ??? | 1 | 11.809 | 9.209  | -33.789 |
| ATOM | 51  | H | ??? | 1 | 10.846 | 9.411  | -33.486 |
| ATOM | 52  | C | ??? | 1 | 11.984 | 8.125  | -34.750 |
| ATOM | 53  | H | ??? | 1 | 12.936 | 7.625  | -34.527 |
| ATOM | 54  | H | ??? | 1 | 11.148 | 7.421  | -34.588 |
| ATOM | 55  | C | ??? | 1 | 12.028 | 8.517  | -36.240 |
| ATOM | 56  | O | ??? | 1 | 13.038 | 8.361  | -36.930 |
| ATOM | 57  | N | ??? | 1 | 10.838 | 8.988  | -36.730 |
| ATOM | 58  | H | ??? | 1 | 10.008 | 8.880  | -36.113 |
| ATOM | 59  | C | ??? | 1 | 10.625 | 9.159  | -38.153 |
| ATOM | 60  | H | ??? | 1 | 11.609 | 9.301  | -38.634 |
| ATOM | 61  | H | ??? | 1 | 10.169 | 8.255  | -38.597 |
| ATOM | 62  | C | ??? | 1 | 9.697  | 10.295 | -38.579 |
| ATOM | 63  | O | ??? | 1 | 9.556  | 10.538 | -39.784 |
| ATOM | 64  | N | ??? | 1 | 9.054  | 10.984 | -37.597 |
| ATOM | 65  | H | ??? | 1 | 9.092  | 10.623 | -36.633 |
| ATOM | 66  | C | ??? | 1 | 8.105  | 12.045 | -37.918 |
| ATOM | 67  | H | ??? | 1 | 8.343  | 12.399 | -38.931 |
| ATOM | 68  | H | ??? | 1 | 7.045  | 11.653 | -37.926 |
| ATOM | 69  | C | ??? | 1 | 8.205  | 13.232 | -36.945 |
| ATOM | 70  | O | ??? | 1 | 8.459  | 14.374 | -37.351 |
| ATOM | 71  | N | ??? | 1 | 7.915  | 12.918 | -35.659 |
| ATOM | 72  | H | ??? | 1 | 7.792  | 11.930 | -35.401 |
| ATOM | 73  | C | ??? | 1 | 7.847  | 13.913 | -34.580 |
| ATOM | 74  | H | ??? | 1 | 7.005  | 14.598 | -34.820 |
| ATOM | 75  | C | ??? | 1 | 7.524  | 13.195 | -33.264 |
| ATOM | 76  | H | ??? | 1 | 8.257  | 12.379 | -33.089 |
| ATOM | 77  | H | ??? | 1 | 7.640  | 13.923 | -32.437 |
| ATOM | 78  | C | ??? | 1 | 6.101  | 12.617 | -33.211 |
| ATOM | 79  | H | ??? | 1 | 5.370  | 13.443 | -33.333 |
| ATOM | 80  | H | ??? | 1 | 5.928  | 11.909 | -34.047 |
| ATOM | 81  | C | ??? | 1 | 5.826  | 11.899 | -31.890 |
| ATOM | 82  | H | ??? | 1 | 6.469  | 11.001 | -31.789 |
| ATOM | 83  | H | ??? | 1 | 6.096  | 12.565 | -31.045 |
| ATOM | 84  | N | ??? | 1 | 4.414  | 11.523 | -31.790 |
| ATOM | 85  | H | ??? | 1 | 3.833  | 11.626 | -32.634 |
| ATOM | 86  | C | ??? | 1 | 3.957  | 10.577 | -30.947 |
| ATOM | 87  | N | ??? | 1 | 4.709  | 10.196 | -29.906 |
| ATOM | 88  | H | ??? | 1 | 5.579  | 10.691 | -29.686 |
| ATOM | 89  | H | ??? | 1 | 4.424  | 9.437  | -29.279 |
| ATOM | 90  | N | ??? | 1 | 2.733  | 10.045 | -31.149 |
| ATOM | 91  | H | ??? | 1 | 2.241  | 10.331 | -32.006 |
| ATOM | 92  | H | ??? | 1 | 2.140  | 9.825  | -30.348 |
| ATOM | 93  | H | ??? | 1 | 8.733  | 14.571 | -34.486 |
| ATOM | 94  | H | ??? | 1 | 8.403  | 7.457  | -28.193 |
| ATOM | 95  | C | ??? | 1 | 9.342  | 7.492  | -28.768 |
| ATOM | 96  | N | ??? | 1 | 9.534  | 6.757  | -29.931 |
| ATOM | 97  | C | ??? | 1 | 10.834 | 6.853  | -30.222 |
| ATOM | 98  | H | ??? | 1 | 11.334 | 6.391  | -31.074 |
| ATOM | 99  | N | ??? | 1 | 11.476 | 7.623  | -29.308 |
| ATOM | 100 | H | ??? | 1 | 12.486 | 7.855  | -29.326 |
| ATOM | 101 | C | ??? | 1 | 10.549 | 8.034  | -28.372 |
| ATOM | 102 | H | ??? | 1 | 10.829 | 8.696  | -27.553 |
| ATOM | 103 | O | ??? | 1 | 10.670 | 5.260  | -25.626 |
| ATOM | 104 | C | ??? | 1 | 10.948 | 4.627  | -26.705 |
| ATOM | 105 | O | ??? | 1 | 12.093 | 4.356  | -27.146 |
| ATOM | 106 | C | ??? | 1 | 9.732  | 4.242  | -27.572 |
| ATOM | 107 | H | ??? | 1 | 8.840  | 4.144  | -26.927 |
| ATOM | 108 | H | ??? | 1 | 9.555  | 5.117  | -28.221 |
| ATOM | 109 | C | ??? | 1 | 9.859  | 3.036  | -28.505 |
| ATOM | 110 | H | ??? | 1 | 10.851 | 3.054  | -28.987 |
| ATOM | 111 | H | ??? | 1 | 9.794  | 2.083  | -27.943 |
| ATOM | 112 | C | ??? | 1 | 8.800  | 3.099  | -29.645 |
| ATOM | 113 | O | ??? | 1 | 9.287  | 3.988  | -30.638 |
| ATOM | 114 | H | ??? | 1 | 10.003 | 3.057  | -31.419 |



|      |     |    |     |   |        |        |         |
|------|-----|----|-----|---|--------|--------|---------|
| ATOM | 115 | C  | ??? | 1 | 7.475  | 3.621  | -29.071 |
| ATOM | 116 | O  | ??? | 1 | 7.094  | 4.757  | -29.537 |
| ATOM | 117 | O  | ??? | 1 | 6.847  | 2.974  | -28.201 |
| ATOM | 118 | C  | ??? | 1 | 8.514  | 1.732  | -30.321 |
| ATOM | 119 | H  | ??? | 1 | 8.138  | 0.988  | -29.599 |
| ATOM | 120 | H  | ??? | 1 | 7.725  | 1.914  | -31.082 |
| ATOM | 121 | C  | ??? | 1 | 9.728  | 1.174  | -31.047 |
| ATOM | 122 | O  | ??? | 1 | 10.437 | 2.090  | -31.702 |
| ATOM | 123 | O  | ??? | 1 | 10.000 | -0.026 | -31.042 |
| ATOM | 124 | FE | ??? | 1 | 8.025  | 7.526  | -33.252 |
| ATOM | 125 | MO | ??? | 1 | 8.058  | 5.573  | -31.326 |
| ATOM | 126 | FE | ??? | 1 | 7.817  | 5.076  | -33.873 |
| ATOM | 127 | FE | ??? | 1 | 5.866  | 6.152  | -32.723 |
| ATOM | 128 | FE | ??? | 1 | 6.652  | 8.422  | -35.229 |
| ATOM | 129 | FE | ??? | 1 | 5.604  | 7.362  | -37.557 |
| ATOM | 130 | FE | ??? | 1 | 7.031  | 5.827  | -36.144 |
| ATOM | 131 | FE | ??? | 1 | 4.863  | 6.655  | -35.114 |
| ATOM | 132 | C  | ??? | 1 | 6.698  | 6.628  | -34.409 |
| ATOM | 133 | S  | ??? | 1 | 7.801  | 7.684  | -37.155 |
| ATOM | 134 | S  | ??? | 1 | 9.662  | 5.985  | -33.035 |
| ATOM | 135 | S  | ??? | 1 | 4.992  | 5.296  | -36.970 |
| ATOM | 136 | S  | ??? | 1 | 8.153  | 3.985  | -35.709 |
| ATOM | 137 | S  | ??? | 1 | 8.572  | 9.407  | -34.383 |
| ATOM | 138 | S  | ??? | 1 | 6.557  | 4.017  | -32.347 |
| ATOM | 139 | S  | ??? | 1 | 4.528  | 8.681  | -36.115 |
| ATOM | 140 | S  | ??? | 1 | 6.814  | 7.603  | -31.281 |
| ATOM | 141 | S  | ??? | 1 | 3.678  | 6.301  | -33.213 |
| ATOM | 142 | N  | ??? | 1 | 5.850  | 9.231  | -33.735 |
| ATOM | 143 | H  | ??? | 1 | 6.561  | 9.684  | -33.128 |
| ATOM | 144 | N  | ??? | 1 | 4.699  | 9.282  | -33.229 |
| ATOM | 145 | H  | ??? | 1 | 4.039  | 8.783  | -33.862 |
| ATOM | 146 | O  | ??? | 1 | 4.518  | 5.571  | -29.410 |
| ATOM | 147 | H  | ??? | 1 | 5.459  | 5.257  | -29.493 |
| ATOM | 148 | H  | ??? | 1 | 4.424  | 6.249  | -30.112 |
| ATOM | 149 | O  | ??? | 1 | 1.099  | 8.363  | -34.222 |
| ATOM | 150 | H  | ??? | 1 | 1.882  | 7.863  | -33.881 |
| ATOM | 151 | H  | ??? | 1 | 0.602  | 8.665  | -33.405 |
| END  |     |    |     |   |        |        |         |

Fe2(cis)

REMARK Energies (QM/MM, QM+ptch) = -17129.760697 -16290.131410

|      |    |   |     |   |        |        |         |
|------|----|---|-----|---|--------|--------|---------|
| ATOM | 1  | H | ??? | 1 | 3.501  | 2.242  | -29.688 |
| ATOM | 2  | C | ??? | 1 | 3.910  | 2.100  | -30.708 |
| ATOM | 3  | H | ??? | 1 | 5.014  | 2.104  | -30.636 |
| ATOM | 4  | H | ??? | 1 | 3.588  | 1.123  | -31.102 |
| ATOM | 5  | N | ??? | 1 | 3.502  | 3.162  | -31.616 |
| ATOM | 6  | H | ??? | 1 | 3.992  | 4.063  | -31.504 |
| ATOM | 7  | C | ??? | 1 | 2.871  | 2.958  | -32.785 |
| ATOM | 8  | N | ??? | 1 | 2.007  | 1.916  | -32.923 |
| ATOM | 9  | H | ??? | 1 | 1.832  | 1.300  | -32.128 |
| ATOM | 10 | H | ??? | 1 | 1.806  | 1.537  | -33.859 |
| ATOM | 11 | N | ??? | 1 | 3.092  | 3.786  | -33.808 |
| ATOM | 12 | H | ??? | 1 | 3.648  | 4.656  | -33.647 |
| ATOM | 13 | H | ??? | 1 | 2.436  | 3.826  | -34.594 |
| ATOM | 14 | H | ??? | 1 | 7.281  | 1.556  | -41.605 |
| ATOM | 15 | C | ??? | 1 | 7.604  | 2.004  | -40.655 |
| ATOM | 16 | N | ??? | 1 | 8.573  | 2.988  | -40.665 |
| ATOM | 17 | C | ??? | 1 | 8.805  | 3.266  | -39.386 |
| ATOM | 18 | H | ??? | 1 | 9.506  | 4.003  | -38.995 |
| ATOM | 19 | N | ??? | 1 | 8.013  | 2.527  | -38.562 |
| ATOM | 20 | H | ??? | 1 | 7.928  | 2.719  | -37.542 |
| ATOM | 21 | C | ??? | 1 | 7.224  | 1.718  | -39.355 |
| ATOM | 22 | H | ??? | 1 | 6.488  | 1.035  | -38.932 |
| ATOM | 23 | H | ??? | 1 | 2.981  | 9.553  | -40.116 |
| ATOM | 24 | C | ??? | 1 | 3.112  | 8.696  | -39.419 |
| ATOM | 25 | H | ??? | 1 | 2.527  | 7.828  | -39.770 |
| ATOM | 26 | H | ??? | 1 | 2.768  | 9.012  | -38.420 |
| ATOM | 27 | S | ??? | 1 | 4.934  | 8.295  | -39.364 |
| ATOM | 28 | H | ??? | 1 | 6.632  | 8.637  | -42.917 |
| ATOM | 29 | C | ??? | 1 | 7.424  | 7.830  | -42.945 |
| ATOM | 30 | H | ??? | 1 | 7.989  | 7.993  | -43.875 |
| ATOM | 31 | H | ??? | 1 | 8.089  | 7.977  | -42.076 |
| ATOM | 32 | C | ??? | 1 | 6.823  | 6.410  | -42.977 |
| ATOM | 33 | O | ??? | 1 | 7.229  | 5.623  | -43.840 |
| ATOM | 34 | N | ??? | 1 | 5.925  | 6.104  | -42.010 |
| ATOM | 35 | H | ??? | 1 | 5.570  | 6.832  | -41.368 |
| ATOM | 36 | C | ??? | 1 | 5.374  | 4.747  | -41.926 |
| ATOM | 37 | H | ??? | 1 | 6.224  | 4.070  | -42.127 |
| ATOM | 38 | C | ??? | 1 | 4.836  | 4.442  | -40.525 |
| ATOM | 39 | H | ??? | 1 | 4.386  | 3.434  | -40.554 |
| ATOM | 40 | H | ??? | 1 | 5.667  | 4.379  | -39.784 |
| ATOM | 41 | O | ??? | 1 | 3.823  | 5.331  | -40.066 |
| ATOM | 42 | H | ??? | 1 | 4.239  | 6.174  | -39.733 |
| ATOM | 43 | H | ??? | 1 | 4.602  | 4.490  | -42.660 |
| ATOM | 44 | H | ??? | 1 | 13.632 | 11.343 | -31.927 |
| ATOM | 45 | C | ??? | 1 | 12.721 | 10.656 | -31.970 |
| ATOM | 46 | H | ??? | 1 | 12.875 | 9.951  | -31.128 |
| ATOM | 47 | H | ??? | 1 | 11.737 | 11.192 | -31.788 |
| ATOM | 48 | C | ??? | 1 | 12.898 | 9.819  | -33.251 |
| ATOM | 49 | O | ??? | 1 | 14.031 | 9.622  | -33.694 |
| ATOM | 50 | N | ??? | 1 | 11.802 | 9.215  | -33.774 |
| ATOM | 51 | H | ??? | 1 | 10.840 | 9.435  | -33.468 |
| ATOM | 52 | C | ??? | 1 | 11.955 | 8.132  | -34.737 |
| ATOM | 53 | H | ??? | 1 | 12.912 | 7.632  | -34.537 |
| ATOM | 54 | H | ??? | 1 | 11.125 | 7.426  | -34.556 |
| ATOM | 55 | C | ??? | 1 | 11.969 | 8.532  | -36.221 |
| ATOM | 56 | O | ??? | 1 | 12.979 | 8.418  | -36.920 |
| ATOM | 57 | N | ??? | 1 | 10.760 | 8.969  | -36.708 |
| ATOM | 58 | H | ??? | 1 | 9.923  | 8.806  | -36.123 |
| ATOM | 59 | C | ??? | 1 | 10.559 | 9.135  | -38.137 |
| ATOM | 60 | H | ??? | 1 | 11.554 | 9.236  | -38.603 |
| ATOM | 61 | H | ??? | 1 | 10.066 | 8.246  | -38.571 |
| ATOM | 62 | C | ??? | 1 | 9.678  | 10.299 | -38.581 |
| ATOM | 63 | O | ??? | 1 | 9.540  | 10.525 | -39.789 |
| ATOM | 64 | N | ??? | 1 | 9.068  | 11.028 | -37.607 |

|      |     |    |     |   |        |        |         |
|------|-----|----|-----|---|--------|--------|---------|
| ATOM | 65  | H  | ??? | 1 | 9.110  | 10.678 | -36.643 |
| ATOM | 66  | C  | ??? | 1 | 8.103  | 12.071 | -37.930 |
| ATOM | 67  | H  | ??? | 1 | 8.332  | 12.424 | -38.946 |
| ATOM | 68  | H  | ??? | 1 | 7.045  | 11.662 | -37.930 |
| ATOM | 69  | C  | ??? | 1 | 8.206  | 13.259 | -36.958 |
| ATOM | 70  | O  | ??? | 1 | 8.476  | 14.399 | -37.360 |
| ATOM | 71  | N  | ??? | 1 | 7.916  | 12.936 | -35.677 |
| ATOM | 72  | H  | ??? | 1 | 7.735  | 11.951 | -35.445 |
| ATOM | 73  | C  | ??? | 1 | 7.845  | 13.902 | -34.572 |
| ATOM | 74  | H  | ??? | 1 | 6.992  | 14.582 | -34.786 |
| ATOM | 75  | C  | ??? | 1 | 7.535  | 13.124 | -33.286 |
| ATOM | 76  | H  | ??? | 1 | 8.317  | 12.356 | -33.115 |
| ATOM | 77  | H  | ??? | 1 | 7.572  | 13.827 | -32.432 |
| ATOM | 78  | C  | ??? | 1 | 6.158  | 12.433 | -33.313 |
| ATOM | 79  | H  | ??? | 1 | 5.361  | 13.206 | -33.300 |
| ATOM | 80  | H  | ??? | 1 | 6.024  | 11.847 | -34.244 |
| ATOM | 81  | C  | ??? | 1 | 5.964  | 11.472 | -32.139 |
| ATOM | 82  | H  | ??? | 1 | 6.648  | 10.606 | -32.244 |
| ATOM | 83  | H  | ??? | 1 | 6.201  | 11.993 | -31.188 |
| ATOM | 84  | N  | ??? | 1 | 4.569  | 11.022 | -32.097 |
| ATOM | 85  | H  | ??? | 1 | 3.965  | 11.191 | -32.916 |
| ATOM | 86  | C  | ??? | 1 | 3.997  | 10.360 | -31.086 |
| ATOM | 87  | N  | ??? | 1 | 4.683  | 10.129 | -29.956 |
| ATOM | 88  | H  | ??? | 1 | 5.629  | 10.505 | -29.842 |
| ATOM | 89  | H  | ??? | 1 | 4.347  | 9.477  | -29.240 |
| ATOM | 90  | N  | ??? | 1 | 2.718  | 9.933  | -31.218 |
| ATOM | 91  | H  | ??? | 1 | 2.246  | 10.199 | -32.093 |
| ATOM | 92  | H  | ??? | 1 | 2.113  | 9.912  | -30.395 |
| ATOM | 93  | H  | ??? | 1 | 8.731  | 14.566 | -34.480 |
| ATOM | 94  | H  | ??? | 1 | 8.407  | 7.458  | -28.188 |
| ATOM | 95  | C  | ??? | 1 | 9.353  | 7.495  | -28.752 |
| ATOM | 96  | N  | ??? | 1 | 9.565  | 6.746  | -29.901 |
| ATOM | 97  | C  | ??? | 1 | 10.865 | 6.851  | -30.186 |
| ATOM | 98  | H  | ??? | 1 | 11.371 | 6.387  | -31.035 |
| ATOM | 99  | N  | ??? | 1 | 11.490 | 7.642  | -29.279 |
| ATOM | 100 | H  | ??? | 1 | 12.496 | 7.886  | -29.297 |
| ATOM | 101 | C  | ??? | 1 | 10.551 | 8.056  | -28.355 |
| ATOM | 102 | H  | ??? | 1 | 10.816 | 8.736  | -27.546 |
| ATOM | 103 | O  | ??? | 1 | 10.666 | 5.254  | -25.629 |
| ATOM | 104 | C  | ??? | 1 | 10.946 | 4.621  | -26.708 |
| ATOM | 105 | O  | ??? | 1 | 12.091 | 4.350  | -27.148 |
| ATOM | 106 | C  | ??? | 1 | 9.729  | 4.236  | -27.576 |
| ATOM | 107 | H  | ??? | 1 | 8.840  | 4.126  | -26.931 |
| ATOM | 108 | H  | ??? | 1 | 9.546  | 5.117  | -28.215 |
| ATOM | 109 | C  | ??? | 1 | 9.860  | 3.041  | -28.523 |
| ATOM | 110 | H  | ??? | 1 | 10.853 | 3.066  | -29.004 |
| ATOM | 111 | H  | ??? | 1 | 9.798  | 2.081  | -27.971 |
| ATOM | 112 | C  | ??? | 1 | 8.800  | 3.108  | -29.663 |
| ATOM | 113 | O  | ??? | 1 | 9.287  | 3.988  | -30.668 |
| ATOM | 114 | H  | ??? | 1 | 9.991  | 3.077  | -31.424 |
| ATOM | 115 | C  | ??? | 1 | 7.477  | 3.633  | -29.087 |
| ATOM | 116 | O  | ??? | 1 | 7.093  | 4.764  | -29.558 |
| ATOM | 117 | O  | ??? | 1 | 6.854  | 2.984  | -28.213 |
| ATOM | 118 | C  | ??? | 1 | 8.510  | 1.739  | -30.335 |
| ATOM | 119 | H  | ??? | 1 | 8.136  | 0.997  | -29.609 |
| ATOM | 120 | H  | ??? | 1 | 7.718  | 1.915  | -31.094 |
| ATOM | 121 | C  | ??? | 1 | 9.725  | 1.180  | -31.062 |
| ATOM | 122 | O  | ??? | 1 | 10.430 | 2.094  | -31.717 |
| ATOM | 123 | O  | ??? | 1 | 9.996  | -0.021 | -31.051 |
| ATOM | 124 | FE | ??? | 1 | 5.908  | 6.327  | -32.613 |
| ATOM | 125 | MO | ??? | 1 | 8.096  | 5.628  | -31.318 |
| ATOM | 126 | FE | ??? | 1 | 7.771  | 5.250  | -33.935 |
| ATOM | 127 | FE | ??? | 1 | 8.072  | 7.644  | -33.074 |
| ATOM | 128 | FE | ??? | 1 | 4.853  | 7.274  | -34.664 |
| ATOM | 129 | FE | ??? | 1 | 6.935  | 6.149  | -36.227 |
| ATOM | 130 | FE | ??? | 1 | 5.313  | 7.985  | -37.100 |
| ATOM | 131 | FE | ??? | 1 | 6.933  | 8.629  | -35.128 |
| ATOM | 132 | C  | ??? | 1 | 6.749  | 6.880  | -34.297 |
| ATOM | 133 | S  | ??? | 1 | 7.639  | 8.104  | -37.173 |
| ATOM | 134 | S  | ??? | 1 | 9.691  | 6.037  | -33.024 |
| ATOM | 135 | S  | ??? | 1 | 4.606  | 5.946  | -36.456 |
| ATOM | 136 | S  | ??? | 1 | 7.964  | 4.147  | -35.785 |
| ATOM | 137 | S  | ??? | 1 | 8.574  | 9.622  | -33.989 |
| ATOM | 138 | S  | ??? | 1 | 6.537  | 4.165  | -32.424 |
| ATOM | 139 | S  | ??? | 1 | 4.766  | 9.399  | -35.349 |
| ATOM | 140 | S  | ??? | 1 | 6.893  | 7.676  | -31.155 |
| ATOM | 141 | S  | ??? | 1 | 3.734  | 6.717  | -32.813 |
| ATOM | 142 | N  | ??? | 1 | 6.938  | 5.531  | -38.048 |
| ATOM | 143 | H  | ??? | 1 | 6.124  | 4.905  | -38.241 |
| ATOM | 144 | N  | ??? | 1 | 7.667  | 5.823  | -39.033 |
| ATOM | 145 | H  | ??? | 1 | 7.290  | 5.366  | -39.894 |
| ATOM | 146 | O  | ??? | 1 | 4.497  | 5.524  | -29.484 |
| ATOM | 147 | H  | ??? | 1 | 5.457  | 5.261  | -29.533 |
| ATOM | 148 | H  | ??? | 1 | 4.389  | 6.205  | -30.186 |
| ATOM | 149 | O  | ??? | 1 | 1.092  | 8.387  | -34.237 |
| ATOM | 150 | H  | ??? | 1 | 1.961  | 8.078  | -33.879 |
| ATOM | 151 | H  | ??? | 1 | 0.578  | 8.681  | -33.428 |

END

Fe6-cis  
REMARK Energies (QM/MM, QM+ptch) = -17129.748904 -16290.123550

|      |    |   |     |   |       |       |         |
|------|----|---|-----|---|-------|-------|---------|
| ATOM | 1  | H | ??? | 1 | 3.503 | 2.240 | -29.688 |
| ATOM | 2  | C | ??? | 1 | 3.916 | 2.095 | -30.708 |
| ATOM | 3  | H | ??? | 1 | 5.020 | 2.099 | -30.633 |
| ATOM | 4  | H | ??? | 1 | 3.597 | 1.115 | -31.098 |
| ATOM | 5  | N | ??? | 1 | 3.511 | 3.150 | -31.625 |
| ATOM | 6  | H | ??? | 1 | 4.011 | 4.047 | -31.529 |
| ATOM | 7  | C | ??? | 1 | 2.870 | 2.937 | -32.789 |
| ATOM | 8  | N | ??? | 1 | 2.001 | 1.900 | -32.913 |
| ATOM | 9  | H | ??? | 1 | 1.833 | 1.286 | -32.114 |
| ATOM | 10 | H | ??? | 1 | 1.798 | 1.513 | -33.846 |
| ATOM | 11 | N | ??? | 1 | 3.085 | 3.757 | -33.819 |
| ATOM | 12 | H | ??? | 1 | 3.659 | 4.618 | -33.682 |
| ATOM | 13 | H | ??? | 1 | 2.437 | 3.782 | -34.612 |
| ATOM | 14 | H | ??? | 1 | 7.279 | 1.559 | -41.618 |

|      |     |   |     |   |        |        |         |
|------|-----|---|-----|---|--------|--------|---------|
| ATOM | 15  | C | ??? | 1 | 7.594  | 2.018  | -40.682 |
| ATOM | 16  | N | ??? | 1 | 8.453  | 3.100  | -40.691 |
| ATOM | 17  | C | ??? | 1 | 8.573  | 3.456  | -39.417 |
| ATOM | 18  | H | ??? | 1 | 9.154  | 4.287  | -39.017 |
| ATOM | 19  | N | ??? | 1 | 7.838  | 2.650  | -38.604 |
| ATOM | 20  | H | ??? | 1 | 7.726  | 2.814  | -37.588 |
| ATOM | 21  | C | ??? | 1 | 7.187  | 1.731  | -39.393 |
| ATOM | 22  | H | ??? | 1 | 6.504  | 0.993  | -38.976 |
| ATOM | 23  | H | ??? | 1 | 2.977  | 9.557  | -40.117 |
| ATOM | 24  | C | ??? | 1 | 3.102  | 8.705  | -39.420 |
| ATOM | 25  | H | ??? | 1 | 2.513  | 7.838  | -39.764 |
| ATOM | 26  | H | ??? | 1 | 2.782  | 9.024  | -38.414 |
| ATOM | 27  | S | ??? | 1 | 4.917  | 8.308  | -39.408 |
| ATOM | 28  | H | ??? | 1 | 6.637  | 8.643  | -42.923 |
| ATOM | 29  | C | ??? | 1 | 7.435  | 7.841  | -42.957 |
| ATOM | 30  | H | ??? | 1 | 8.005  | 8.021  | -43.881 |
| ATOM | 31  | H | ??? | 1 | 8.092  | 7.980  | -42.081 |
| ATOM | 32  | C | ??? | 1 | 6.836  | 6.419  | -43.008 |
| ATOM | 33  | O | ??? | 1 | 7.260  | 5.639  | -43.871 |
| ATOM | 34  | N | ??? | 1 | 5.922  | 6.124  | -42.063 |
| ATOM | 35  | H | ??? | 1 | 5.592  | 6.845  | -41.403 |
| ATOM | 36  | C | ??? | 1 | 5.391  | 4.763  | -41.926 |
| ATOM | 37  | H | ??? | 1 | 6.247  | 4.094  | -42.127 |
| ATOM | 38  | C | ??? | 1 | 4.926  | 4.520  | -40.486 |
| ATOM | 39  | H | ??? | 1 | 4.593  | 3.469  | -40.414 |
| ATOM | 40  | H | ??? | 1 | 5.764  | 4.661  | -39.770 |
| ATOM | 41  | O | ??? | 1 | 3.814  | 5.337  | -40.092 |
| ATOM | 42  | H | ??? | 1 | 4.183  | 6.175  | -39.711 |
| ATOM | 43  | H | ??? | 1 | 4.607  | 4.494  | -42.655 |
| ATOM | 44  | H | ??? | 1 | 13.631 | 11.344 | -31.927 |
| ATOM | 45  | C | ??? | 1 | 12.720 | 10.656 | -31.972 |
| ATOM | 46  | H | ??? | 1 | 12.875 | 9.949  | -31.132 |
| ATOM | 47  | H | ??? | 1 | 11.737 | 11.192 | -31.789 |
| ATOM | 48  | C | ??? | 1 | 12.899 | 9.823  | -33.255 |
| ATOM | 49  | O | ??? | 1 | 14.036 | 9.628  | -33.692 |
| ATOM | 50  | N | ??? | 1 | 11.810 | 9.218  | -33.794 |
| ATOM | 51  | H | ??? | 1 | 10.844 | 9.421  | -33.493 |
| ATOM | 52  | C | ??? | 1 | 11.992 | 8.141  | -34.757 |
| ATOM | 53  | H | ??? | 1 | 12.962 | 7.666  | -34.553 |
| ATOM | 54  | H | ??? | 1 | 11.182 | 7.411  | -34.582 |
| ATOM | 55  | C | ??? | 1 | 11.999 | 8.531  | -36.243 |
| ATOM | 56  | O | ??? | 1 | 13.001 | 8.398  | -36.949 |
| ATOM | 57  | N | ??? | 1 | 10.793 | 8.975  | -36.724 |
| ATOM | 58  | H | ??? | 1 | 9.959  | 8.833  | -36.128 |
| ATOM | 59  | C | ??? | 1 | 10.592 | 9.154  | -38.150 |
| ATOM | 60  | H | ??? | 1 | 11.585 | 9.292  | -38.613 |
| ATOM | 61  | H | ??? | 1 | 10.138 | 8.254  | -38.602 |
| ATOM | 62  | C | ??? | 1 | 9.678  | 10.296 | -38.582 |
| ATOM | 63  | O | ??? | 1 | 9.535  | 10.524 | -39.790 |
| ATOM | 64  | N | ??? | 1 | 9.052  | 11.005 | -37.605 |
| ATOM | 65  | H | ??? | 1 | 9.110  | 10.670 | -36.635 |
| ATOM | 66  | C | ??? | 1 | 8.100  | 12.061 | -37.929 |
| ATOM | 67  | H | ??? | 1 | 8.333  | 12.410 | -38.946 |
| ATOM | 68  | H | ??? | 1 | 7.043  | 11.659 | -37.930 |
| ATOM | 69  | C | ??? | 1 | 8.208  | 13.251 | -36.959 |
| ATOM | 70  | O | ??? | 1 | 8.477  | 14.390 | -37.365 |
| ATOM | 71  | N | ??? | 1 | 7.919  | 12.931 | -35.678 |
| ATOM | 72  | H | ??? | 1 | 7.749  | 11.945 | -35.442 |
| ATOM | 73  | C | ??? | 1 | 7.845  | 13.898 | -34.573 |
| ATOM | 74  | H | ??? | 1 | 6.991  | 14.577 | -34.787 |
| ATOM | 75  | C | ??? | 1 | 7.534  | 13.113 | -33.290 |
| ATOM | 76  | H | ??? | 1 | 8.322  | 12.351 | -33.119 |
| ATOM | 77  | H | ??? | 1 | 7.563  | 13.814 | -32.433 |
| ATOM | 78  | C | ??? | 1 | 6.163  | 12.412 | -33.327 |
| ATOM | 79  | H | ??? | 1 | 5.360  | 13.180 | -33.309 |
| ATOM | 80  | H | ??? | 1 | 6.034  | 11.832 | -34.262 |
| ATOM | 81  | C | ??? | 1 | 5.972  | 11.443 | -32.159 |
| ATOM | 82  | H | ??? | 1 | 6.655  | 10.577 | -32.271 |
| ATOM | 83  | H | ??? | 1 | 6.212  | 11.957 | -31.206 |
| ATOM | 84  | N | ??? | 1 | 4.577  | 10.990 | -32.115 |
| ATOM | 85  | H | ??? | 1 | 3.967  | 11.173 | -32.925 |
| ATOM | 86  | C | ??? | 1 | 3.998  | 10.352 | -31.092 |
| ATOM | 87  | N | ??? | 1 | 4.681  | 10.132 | -29.957 |
| ATOM | 88  | H | ??? | 1 | 5.625  | 10.512 | -29.842 |
| ATOM | 89  | H | ??? | 1 | 4.338  | 9.494  | -29.232 |
| ATOM | 90  | N | ??? | 1 | 2.716  | 9.931  | -31.218 |
| ATOM | 91  | H | ??? | 1 | 2.245  | 10.189 | -32.097 |
| ATOM | 92  | H | ??? | 1 | 2.110  | 9.934  | -30.395 |
| ATOM | 93  | H | ??? | 1 | 8.732  | 14.564 | -34.480 |
| ATOM | 94  | H | ??? | 1 | 8.406  | 7.466  | -28.179 |
| ATOM | 95  | C | ??? | 1 | 9.355  | 7.516  | -28.727 |
| ATOM | 96  | N | ??? | 1 | 9.581  | 6.778  | -29.878 |
| ATOM | 97  | C | ??? | 1 | 10.887 | 6.887  | -30.144 |
| ATOM | 98  | H | ??? | 1 | 11.411 | 6.435  | -30.986 |
| ATOM | 99  | N | ??? | 1 | 11.496 | 7.673  | -29.224 |
| ATOM | 100 | H | ??? | 1 | 12.503 | 7.917  | -29.233 |
| ATOM | 101 | C | ??? | 1 | 10.545 | 8.079  | -28.310 |
| ATOM | 102 | H | ??? | 1 | 10.795 | 8.762  | -27.498 |
| ATOM | 103 | O | ??? | 1 | 10.682 | 5.267  | -25.600 |
| ATOM | 104 | C | ??? | 1 | 10.959 | 4.644  | -26.683 |
| ATOM | 105 | O | ??? | 1 | 12.100 | 4.376  | -27.134 |
| ATOM | 106 | C | ??? | 1 | 9.741  | 4.262  | -27.546 |
| ATOM | 107 | H | ??? | 1 | 8.845  | 4.175  | -26.907 |
| ATOM | 108 | H | ??? | 1 | 9.573  | 5.131  | -28.205 |
| ATOM | 109 | C | ??? | 1 | 9.877  | 3.046  | -28.458 |
| ATOM | 110 | H | ??? | 1 | 10.873 | 3.049  | -28.930 |
| ATOM | 111 | H | ??? | 1 | 9.804  | 2.099  | -27.889 |
| ATOM | 112 | C | ??? | 1 | 8.834  | 3.087  | -29.603 |
| ATOM | 113 | O | ??? | 1 | 9.345  | 4.009  | -30.600 |
| ATOM | 114 | H | ??? | 1 | 10.132 | 3.943  | -33.143 |
| ATOM | 115 | C | ??? | 1 | 7.507  | 3.639  | -29.079 |
| ATOM | 116 | O | ??? | 1 | 7.142  | 4.773  | -29.557 |
| ATOM | 117 | O | ??? | 1 | 6.866  | 2.996  | -28.216 |
| ATOM | 118 | C | ??? | 1 | 8.598  | 1.732  | -30.294 |
| ATOM | 119 | H | ??? | 1 | 8.177  | 1.002  | -29.581 |

|      |     |    |     |   |        |        |         |
|------|-----|----|-----|---|--------|--------|---------|
| ATOM | 120 | H  | ??? | 1 | 7.851  | 1.892  | -31.101 |
| ATOM | 121 | C  | ??? | 1 | 9.860  | 1.158  | -30.959 |
| ATOM | 122 | O  | ??? | 1 | 10.637 | 2.043  | -31.515 |
| ATOM | 123 | O  | ??? | 1 | 10.013 | -0.074 | -30.983 |
| ATOM | 124 | FE | ??? | 1 | 8.002  | 7.718  | -33.112 |
| ATOM | 125 | MO | ??? | 1 | 8.106  | 5.707  | -31.307 |
| ATOM | 126 | FE | ??? | 1 | 7.038  | 8.484  | -35.324 |
| ATOM | 127 | FE | ??? | 1 | 5.918  | 6.338  | -32.636 |
| ATOM | 128 | FE | ??? | 1 | 8.043  | 5.115  | -33.900 |
| ATOM | 129 | FE | ??? | 1 | 6.842  | 6.012  | -36.058 |
| ATOM | 130 | FE | ??? | 1 | 5.506  | 7.810  | -37.271 |
| ATOM | 131 | FE | ??? | 1 | 4.931  | 7.143  | -34.802 |
| ATOM | 132 | C  | ??? | 1 | 6.814  | 6.811  | -34.303 |
| ATOM | 133 | S  | ??? | 1 | 7.727  | 7.676  | -37.364 |
| ATOM | 134 | S  | ??? | 1 | 9.730  | 6.319  | -32.955 |
| ATOM | 135 | S  | ??? | 1 | 4.729  | 5.731  | -36.605 |
| ATOM | 136 | S  | ??? | 1 | 7.970  | 4.203  | -35.955 |
| ATOM | 137 | S  | ??? | 1 | 8.551  | 9.629  | -34.175 |
| ATOM | 138 | S  | ??? | 1 | 6.589  | 4.211  | -32.397 |
| ATOM | 139 | S  | ??? | 1 | 4.952  | 9.291  | -35.569 |
| ATOM | 140 | S  | ??? | 1 | 6.856  | 7.715  | -31.164 |
| ATOM | 141 | S  | ??? | 1 | 3.764  | 6.713  | -32.919 |
| ATOM | 142 | N  | ??? | 1 | 9.209  | 3.656  | -33.551 |
| ATOM | 143 | H  | ??? | 1 | 9.852  | 1.927  | -33.307 |
| ATOM | 144 | N  | ??? | 1 | 9.022  | 2.424  | -33.691 |
| ATOM | 145 | H  | ??? | 1 | 9.992  | 3.379  | -31.137 |
| ATOM | 146 | O  | ??? | 1 | 4.526  | 5.525  | -29.486 |
| ATOM | 147 | H  | ??? | 1 | 5.483  | 5.254  | -29.540 |
| ATOM | 148 | H  | ??? | 1 | 4.426  | 6.208  | -30.188 |
| ATOM | 149 | O  | ??? | 1 | 1.092  | 8.389  | -34.233 |
| ATOM | 150 | H  | ??? | 1 | 1.947  | 8.051  | -33.868 |
| ATOM | 151 | H  | ??? | 1 | 0.573  | 8.683  | -33.426 |
| END  |     |    |     |   |        |        |         |
